# Mouse *Eya* homologues of the *Drosophila eyes absent* gene require *Pax6* for expression in lens and nasal placode

Pin-Xian Xu<sup>1,2</sup>, Ian Woo<sup>1,2</sup>, Helen Her<sup>2</sup>, David R. Beier<sup>2</sup> and Richard L. Maas<sup>1,2,\*</sup>

<sup>1</sup>Howard Hughes Medical Institute, Brigham and Women's Hospital, Boston, MA 02115, USA

<sup>2</sup>Division of Genetics, Department of Medicine, Brigham and Women's Hospital and Harvard Medical School, Boston, MA 02115, USA

\*Author for correspondence (e-mail: maas@rascal.med.harvard.edu)

## SUMMARY

We have identified and mapped three members of a new family of vertebrate genes, designated *Eya1*, *Eya2* and *Eya3*, which share high sequence similarity with the *Drosophila eyes absent (eya)* gene. Comparison of all three murine *Eya* gene products and that encoded by the *Drosophila eya* gene defines a 271 amino acid carboxyl terminal *Eya* domain, which has been highly conserved during evolution. *Eya1* and *Eya2*, which are closely related, are extensively expressed in cranial placodes, in the branchial arches and CNS and in complementary or overlapping patterns during organogenesis. *Eya3* is also expressed in the branchial arches and CNS, but lacks cranial placode expression. All three *Eya* genes are expressed in the developing eye. *Eya1* is expressed in developing anterior chamber structures, including the lens placode, the iris and ciliary region and the prospective corneal ectoderm. *Eya1* is also expressed in retinal pigment

epithelium and optic nerve. *Eya2* is expressed in neural retina, sclera and optic nerve sheath. Moreover, *Eya1* and *Eya2* expressions in the lens and nasal placode overlap with and depend upon expression of *Pax6*. The high sequence similarity with *Drosophila eya*, the conserved developmental expression of *Eya* genes in the eye and the *Pax6* dependence of *Eya* expression in the lens and nasal placode indicates that these genes likely represent functional homologues of the *Drosophila eya* gene. These results suggest that members of the *Eya* gene family play critical roles downstream of *Pax* genes in specifying placodal identity and support the idea that despite enormous morphological differences, the early development of insect and mammalian eyes is controlled by a conserved regulatory hierarchy.

Key words: cranial placodes, *Eya* genes, *Eya* domain, *eyes absent*, eye and nasal development, organogenesis, *Pax6*, *Small eye*

## INTRODUCTION

The vertebrate eye originates from primordial tissues derived from a number of sources, including the surface and neural ectoderm, the neural crest and mesodermal mesenchyme. During eye development, a series of reciprocal cellular interactions occur that determine the fate of the prospective eye tissues. The most striking of these is the pulsed succession of signals and responses between the developing lens and neural retina. In particular, induction of the vertebrate lens provides an important paradigm for understanding the mechanism of inductive tissue interactions in early organogenesis (for review, see Grainger, 1996).

*Pax6*, a member of the paired box family of transcription factors, has been identified as a key regulator of eye development in both vertebrates and invertebrates (reviewed in Glaser et al., 1995; Hanson et al., 1995). The mouse *Pax6* gene is expressed throughout eye development (Walther and Gruss, 1991; Grindley et al., 1995), and *Pax6* mutations are responsible for the mouse mutation *Small eye (Sey)* and the human ocular defect aniridia (Hill et al., 1991; Ton et al., 1991). In both species, homozygosity for *Pax6* loss of function results in

loss of eyes and nasal cavities (Hogan et al., 1986; Glaser et al., 1994). These phenotypes originate from an absence of lens and nasal placode formation, and could result from a failure of inductive interactions between the head surface ectoderm, which gives rise to the placodes, and the underlying neural plate or mesodermal mesenchyme (Hogan et al., 1986).

In vertebrate embryos, *Pax6* is expressed in head surface ectoderm in both the lens- and nose-forming regions prior to placode formation (Walther and Gruss, 1991; Li et al., 1994; Grindley et al., 1995). *Pax6* is subsequently expressed in the placodes themselves and in the developing neural retina. Based upon its expression pattern, it has been suggested that *Pax6* is involved in the early establishment of lens competent regions within the head ectoderm (Li et al., 1994). In fact, recombination experiments between head surface ectoderm and optic vesicle of wild-type and rat *Small eye (rSey)* embryos have shown that *Pax6* function is required in the surface ectoderm but not in the optic vesicle for lens induction (Fujiwara et al., 1994). Nonetheless, *Pax6* function in the neuroectoderm is likely to be important for retinal specification since *Pax6* overexpression results in a loss of photoreceptors (Schedl et al., 1996). Thus, in vertebrate eye development, *Pax6* appears to

subserve separate ectodermal and neuroectodermal functions involved in patterning the lens and retina, respectively.

In *Drosophila*, a *Pax6* homologue, the *eyeless* (*ey*) gene, is initially expressed in eye progenitor cells and subsequently remains strongly expressed during differentiation of the eye imaginal disc anterior to the morphogenetic furrow. Loss-of-function mutations in *Drosophila ey* cause an eyeless phenotype (Quiring et al., 1994), and ectopic expression of *ey* in imaginal discs induces ectopic eyes in wings, legs, antennae and halteres (Halder et al., 1995a). Strikingly, the murine *Pax6* gene product can also direct the development of ectopic eyes in *Drosophila*, presumably by either activating the endogenous *Drosophila ey* gene or by directly activating downstream genes involved in eye development (Halder et al., 1995a). It has been suggested that the *Drosophila* compound eye and the vertebrate eye evolved from a common ancestor, and that early eye development of mammals and insects is controlled by similar *Pax6*-regulated genetic cascades (Halder et al., 1995a,b; Zuker, 1995). *Pax6* genes have therefore been proposed to be master control genes for eye development throughout metazoa (Halder et al., 1995a).

Despite this information, and with the notable exception of various crystallin genes (reviewed in Cvekl and Piatigorsky, 1996), the targets for *Pax6* regulation in the developing vertebrate eye are unknown. In *Drosophila*, genes expressed anterior to the morphogenetic furrow are likely to include direct downstream targets of the *Pax6* protein encoded by *ey*. Two *Drosophila* genes that affect eye development and are expressed anterior to the morphogenetic furrow are *eyes absent* (*eya*) and *sine oculis* (*so*). *Eya* encodes a novel nuclear protein of unknown function, while *so* encodes a homeoprotein; both are required for eye development (Bonini et al., 1993; Cheyette et al., 1994; Serikaku and O'Tousa, 1994). Loss-of-function mutations in *so*, *eya* or *ey* all result in progenitor cell death anterior to the furrow during the third larval instar and a variably penetrant eyeless or reduced eye phenotype (Ransom, 1979; Bonini et al., 1993). However, unlike *ey*, neither *eya* or *so* can direct ectopic eye formation (Bonini and Choi, 1995). Moreover, *ey* expression is preserved in eye discs of *eya* and *so* mutants (Halder et al., 1995a). Thus, in *Drosophila*, *ey* appears to function genetically upstream of *eya* and *so*.

As one approach to identifying *Pax6* regulatory targets in mammalian eye development, we have sought to identify mouse homologues of genes involved in early *Drosophila* eye development. In this paper, we describe the isolation, mapping and developmental expression of three murine homologues of the *Drosophila eya* gene, which we have designated *Eya1*, *Eya2* and *Eya3*, and we show that the lens and nasal placodal expression of *Eya1* and *Eya2* requires *Pax6*. The high sequence homology of murine *Eya* family members with *Drosophila eya*, their conserved developmental expression in the eye, and the dependence of *Eya1* and *Eya2* expression upon *Pax6* indicates that these genes are likely to represent functional homologues of the *Drosophila eya* gene. Our results support the molecular conservation of early eye development between insects and mammals.

## MATERIALS AND METHODS

### Isolation of *Eya1*, *Eya2* and *Eya3* cDNAs

A 717 bp DNA fragment corresponding to amino acids 372 to 610 of

the *Drosophila eya* gene (Bonini et al., 1993) was generated by PCR amplification of Oregon R genomic DNA using primers 5'-ggaaTTC-CATGTGGCGGCCTCCTCG-3' and 5'-ggaattCTTGATCTTGCG-GTAGCGGAAG-3'. After *EcoRI* digestion, this fragment was cloned into pBluescriptII KS<sup>+</sup> (Stratagene) and verified by DNA sequencing. Approximately 1×10<sup>6</sup> clones from a random-primed mouse E11.5 embryonic cDNA library (Clontech) were screened using this PCR fragment. After washing twice with 2× SSC, 0.1% SDS at room temperature and twice with 0.5× SSC, 0.1% SDS at 50°C, positive clones were subcloned into pBluescriptII KS<sup>+</sup>, restriction mapped, and sequenced on both strands using Sequenase 2.0 (United States Biochemical). From this screen, *Eya1* and *Eya3* clones were recovered. Longer *Eya1* cDNA clones and several *Eya2* cDNAs were obtained by using a partial *Eya1* cDNA as a probe. An N-terminal extension of the *Eya2* open reading frame (nt 1-300, Fig. 1B) was obtained by PCR from a plasmid cDNA library prepared from mouse postnatal day 0-3 eyes.

### Chromosomal mapping of *Eya1*, *Eya2* and *Eya3*

For chromosomal mapping by SSCP (single strand conformation polymorphism) analysis, regions of 3'-UTR of *Eya2* and *Eya3* were amplified by PCR using the primers described below and tested for SSCPs between mouse strains (Beier, 1993). Two primer pairs with the sequence 5'-AGAAGTGTCTTCTTCCCTTGGG-3' (forward, nt 1767-1788) and 5'-TGTCCCTGAAACACAAACTGG-3' (reverse, nt 1970-1950), and 5'-CCAGCTCGTCTTGTCTCCTT-3' (forward, nt 1840-1860) and 5'-ACAAGATGGCGGCATAAGG-3' (reverse, nt 2065-2047) each identified a polymorphism for *Eya2* between C57BL/6J and DBA/2J, and were used to analyze DNA prepared from the BXD recombinant inbred series. Two primer pairs with the sequence 5'-CTCGGTCTCCTTGGCAGTC-3' (forward, nt 2139-2157) and 5'-AGGCCAGCATCTGACGACT-3' (reverse, nt 2384-2366), and 5'-GGCATCTCCCATCTTGTAAGC-3' (forward, nt 2118-2138) and 5'-GCTCTGCAGGAGCACGAG-3' (reverse, nt 2325-2308) each identified a polymorphism in *Eya3* between C57BL/6J and *M. spretus*, and were used to analyze DNA prepared from the BSS backcross (Rowe et al., 1994). *Eya1* was mapped by Southern analysis of *PstI*-digested DNA from the BSS cross using a 150 bp fragment of 5'-UTR obtained by PCR from the *Eya1* cDNA. The strain distribution patterns were analyzed using the Map Manager Program (Manley, 1991).

### Northern blot analysis

*Eya1* (200 bp, nt 151-350), *Eya2* (203 bp, nt 1718-1920) and *Eya3* (200 bp, nt 2101-2300) cDNA probe fragments were gel purified and labeled by random priming. Poly(A)<sup>+</sup> RNA was prepared from E11.5 CD1 mouse embryos using RNAzol B (Biotech Laboratories) and oligo (dT)<sub>30</sub> selection (Qiagen), and 5 µg quantities were electrophoresed in a 1.2% agarose-formaldehyde gel and transferred to a nylon membrane. Filters were washed at 65°C in 0.1× SSC, 0.1% SDS.

### Genotype analysis

Genotypes of *Sey*<sup>Neu</sup>/*Sey*<sup>Neu</sup> embryos (allele generously provided by Dr J. Favor, Institut für Saugtiergenetik, Neuherberg) were determined by PCR using genomic DNA from extra-embryonic membranes of E9.5-10.5 embryos. Primers 10.5 (5'-GCATAG-GCAGGTTATTTGCC-3') and PSTMSE (5'-GGAATTCCTGAG-GAACCAGAGAAGACAGGC-3') were used at an annealing temperature of 60°C for 35 cycles to amplify a 220 bp *Pax6* fragment. The *Sey*<sup>Neu</sup> allele has a single-base-pair change within the *Pax6* gene that gives rise to a novel *HindII* site (Hill et al., 1991). After *HindII* digestion, the *Sey*<sup>Neu</sup> allele yields 140 and 80 bp fragments which were resolved by agarose gel electrophoresis from the uncut wild-type 220 bp PCR product (Quinn et al., 1996).

### Whole-mount and tissue section in situ hybridization

Whole-mount in situ hybridization was performed as described

(Rosen and Beddington, 1993). Sense and antisense digoxigenin-labeled RNA probes were prepared from *Eya1*, *Eya2* and *Eya3* cDNA inserts in pBluescript II KS<sup>+</sup> using a DIG RNA Labeling kit (Boehringer Mannheim). Embryos were fixed in phosphate-buffered saline (PBS) (pH7.3)/0.1% Triton X-100/3.7% formaldehyde and stored in 100% methanol at -20°C. After rehydration, embryos were washed with three changes of detergent mix at room temperature (30 minutes per wash), and then treated with proteinase K (5-10 µg/ml, 10 minutes at room temperature). Hybridization was carried out at 60°C for 16 hours. After high stringency washes and RNase treatment, the embryos were visualized with an alkaline phosphatase-coupled anti-digoxigenin antibody and sectioned using a vibrating microtome.

For tissue section in situ hybridization, embryos were dissected, fixed overnight in 4% paraformaldehyde, dehydrated, embedded in wax and sectioned at 8 µm. High-stringency hybridization, washing and RNase treatment were performed as described (Wilkinson and Green, 1990). T3 or T7 RNA polymerase in vitro transcribed sense or antisense <sup>35</sup>S-labeled RNA probes were generated from various pBluescript II KS<sup>+</sup> subclones containing different regions of *Eya1* and *Eya2*. The exposure time was 5-10 days at 4°C. Photographs were taken using Kodak EPY 64T or 160T on a Zeiss Axiophot microscope equipped with a dark-field condenser.

## RESULTS

### Isolation and structural analysis of mouse *Eya1*, *Eya2* and *Eya3* cDNAs

cDNAs were obtained corresponding to three distinct *Eya* genes, designated *Eya1*, *Eya2* and *Eya3* (Fig. 1A-C). Overlapping *Eya1* and *Eya2* cDNAs each spanned 2.2 kb, while the longest *Eya3* cDNA spanned 3.5 kb. Northern blot analysis of poly(A)<sup>+</sup> RNA prepared from E11.5 mouse embryos revealed *Eya1* and *Eya2* transcripts of 5.6 and 3.4 kb respectively, and two *Eya3* transcripts of 6.9 and 3.8 kb (Fig. 1D). Although the isolated *Eya* cDNAs are not full length, the *Eya1*, *Eya3* and potentially *Eya2* cDNAs contain the complete coding sequences.

The deduced amino acid sequences for the three *Eya* gene products are shown in Fig. 1A-C. For *Eya1* and *Eya3*, it was possible to unambiguously assign a single initiation codon and to validate the open reading frame. In vitro translation experiments yielded protein products of 65 and 46 kDa respectively, consistent with the predicted sizes for *Eya1* (64.5 kDa) and for *Eya3* (45.5 kDa) (data not shown). Thus, the murine *Eya1* and *Eya3* proteins are respectively 591 and 416 amino acids, smaller than the 760 amino acid *Drosophila* *Eya* protein. For *Eya2*, it was not possible to unambiguously assign an initiation codon because the reading frame in the cDNA remains open N terminal to the ATG. This ATG conforms to the Kozak consensus, however, and would predict a 532 amino acid (58 kDa) gene product.

Analysis of the *Eya* protein sequences reveals two distinct domains, a non-conserved amino (N-) terminal region differing in length between different *Eya* proteins, and a highly conserved 271 amino acid carboxyl (C-) terminal region (in Fig. 1A-C (**bold**),E,F). Although *Drosophila* *Eya* shares 43, 46 and 49% respective overall identity with mouse *Eya1*, *Eya2* and *Eya3*, most of the identity resides in the C-terminal domain. The N-terminal domains of *Eya1*, *Eya2* and *Eya3* consist of 41, 35 and 34% proline, serine and threonine residues respectively, and large numbers of alanine, glycine and glutamine residues are also present. However, except for

*Eya1* and *Eya2*, which are 47% identical in their N-terminal domains, there is minimal conservation at the primary sequence level between the N termini of the different *Eya* gene products.

In contrast, when the C termini of the *Drosophila* and three mammalian *Eya* gene products are compared, a discrete 271 residue C-terminal domain can be identified based upon a remarkably high degree of sequence conservation (Fig. 1E,F). We have named this highly conserved C-terminal region the *Eya* domain and the DNA sequence encoding it the *Eya* box. Within the *Eya* domain, *Eya1*, *Eya2* and *Eya3* share 73, 67 and 63% identity with the *Drosophila* *eya* gene product. The striking evolutionary conservation of the *Eya* domain suggests major functional importance.

### Chromosomal mapping of *Eya1*, *Eya2* and *Eya3*

As shown in Fig. 2, *Eya1* maps to mouse chromosome 1 with a LOD likelihood score of 25.0. *Eya2* maps to chromosome 2 with a LOD score of 7.8 and was non-recombinant in the 26 BXD substrains with *Pmv33*, the most distal marker on chromosome 2 mapped in this cross. *Eya3* maps to mouse chromosome 4 with a LOD likelihood score of 28.3. No recombinants were found between *Eya3* and *D4Mit339* in 94 progeny. The chromosomal locations for *Eya1*, *Eya2* and *Eya3* correspond to regions of conserved synteny in the human genome.

### *Eya1* and *Eya2* are expressed in the cranial placodes during placode differentiation

To study whether *Eya1*, *Eya2* and *Eya3* expression colocalizes with that of *Pax6*, *Eya* expression was analyzed in E8.5-16.5 mouse embryos. Below, we consider the expression patterns for all three *Eya* genes, then focus in depth on the expression of *Eya1* and *Eya2*, which in many cases is either overlapping or complementary.

At E8.5, *Eya1* and *Eya2* are already expressed in the pre-somitic mesoderm and head mesenchyme, while *Eya3* is expressed in head mesenchyme (data not shown). Subsequently, at E9.5-10.5, *Eya1* expression is maintained in head mesenchyme and somites and appears in brain, pharyngeal pouches, nephrogenic cord and branchial arches (Fig. 3A,B). *Eya2* is similarly expressed in somites and brain, but unlike *Eya1*, is also expressed in dorsal root ganglia (Fig. 3C,D).

A major defining feature for *Eya1* and *Eya2* at this stage is their combined expression in all ectodermal cranial placodes and placode derivatives. Both *Eya1* and *Eya2* are expressed in the epibranchial placodes and their cranial ganglia derivatives, the facio-acoustic (VII-VIII) ganglionic complex and the glosopharyngeal (IX) and vagus (X) ganglia (Figs 3A-D, 4A-D). However, the placodal expression patterns of *Eya1* and *Eya2* are not identical. *Eya1* but not *Eya2* is expressed in the otic vesicle, a derivative of the otic placode, and in Rathke's pouch, the anterior pituitary anlage. Because of its ectodermal origin and capacity for endocrine differentiation, Rathke's pouch is considered a cranial placode (Verwoerd and van Oostrom, 1979). Conversely, *Eya2* is expressed in the trigeminal (V) placode and ganglion, while *Eya1* is not. Finally, *Eya1* is expressed in both lens and nasal placodes, whereas *Eya2* is only expressed in the nasal placode (Fig. 5). We conclude that *Eya1* and *Eya2* are likely to play critical roles in the induction and differentiation of ectodermal cranial placodes.

In contrast to *Eya1* and *Eya2*, *Eya3* at E9.5-10.5 is expressed



**A**

CGAGAGCATTGTAGGGCTCAGCCATGTGCTCTATGTAATTAAAGAGCTGACAGTGAAGCAC 60  
 AGTTAACACCCTCTCTAATTGTTACCCCTGACCACAGGTGCGAACGCTCTCACAGCAGT 120  
 TCCGATGTGTCTTTCTCCTCAAGTTGCAGGTCTATGGAATGCAGGATCTAACCCAGCCC 180  
 M E M Q D L T S P 9  
 CATAGCCGACTGAGTGGTAGTGAATCCCCAGTGGTCCCAACTCGATAGCTCTCAT 240  
 H S R L S G S S E S P S G P K L D S S H 29  
 ATAAATAGTACTTCCATGACTCCCAATGGCACCAGGAGTTAAACACAGAGCCAATGAGCAGC 300  
 I N S T S M T P N G T E V K T E P M S S 49  
 AGTGAATAGCTTCAACAGCAGCAGACGGTCTTTAGACAGTTTCTCAGGTTCCAGTCTCTC 360  
 S E I A S T A A D G S L D S F S G S A L 69  
 GGAAGCAGCAGCTTTAGTCCAAGACCAGCTCACCCGTTCTTCCACACAGATTTATCCT 420  
 G S S S F S P R P A H P F S P P Q I Y P 89  
 TCCAATCATACCACATATTTCCCTACCCCTTCTCACAACTATGGTGCATATGGG 480  
 S K S Y P H I L A P T P S S Q T M A A Y G 109  
 CAACACAGTATTACACAGGAATCAACAGCCAGCAGCTACGCCAGTACCCACAGCCT 540  
 Q T Q F T T G M Q Q A T A Y A T Y P Q P 129  
 GGACAGCCATGGAATTTCTCCTATGGTGCATTTGGGCGAGGATCAAGACGGAAAGT 600  
 G Q P Y G I S Y G A L W A G I K T E S 149  
 GGATTTCAGAGTTCAGTCACTGGACGAGGGATTTCTTAGCTATGGTCAAGCTTT 160  
 G L S Q S Q S P G Q T G F L S Y G T S F 169  
 GGTACCCCTCAACTGGACAGCCAGTACAGTACCCAGTACAGATGCAAGGTAGCAGCTTACC 720  
 G T P P G Q A P Y S Y Q M Q G S S F T 189  
 ACGTCACTCAGGATATATTCAGGAAATAATCACTACCAACTCTCCGGATTCACAGT 780  
 T S S G L Y S G N N S L T N S S G F N S 209  
 TCAACAGGACTATCCGTCTTATCCGGCTTTGGCCAGGGTCACTACGACAGTATAT 240  
 S Q Q D Y P S Y P G F G Q G Q Y A Q Y Y 229  
 AACAGCTCGCCGATCCAGCAGTACATGACGAGCAGTAAACACAGCCGACACACCCG 900  
 N S S P Y P A H Y M T S S N T S P T T P 949  
 TCCACCAATGCCACTTACCAACTCCAGGAACCACTTCTGGCTCACAAGTCCAGCCGTC 240  
 S T N A T Y Q L Q E P P S G V T S Q A V 269  
 ACAGACCCACAGCAGAGTACAGTACAATCCACAGTCTTCCACACCCATTAAAGAGACT 1020  
 T D P T A E Y S T I H S P S T P I K E T 289  
 GACTCCGAGCGCTGCGTCCAGGTTCCAGTGGGAAGTACGTCGGCCGAGGACAGAAAC 1080  
 D S E R L R R G S D G K S R G R G R R N 309  
 AATAATCCCTCCCTCCCGGATTTCTGACCTTGGAGAGTGTACTCTGGACCTGGAC 1140  
 N N P S P P P D S D L E R V L L W D L D 329  
 GAGACCATTTGTTTCCACTCTTGTCTACGGGCTCTACGCCCAACAGATACGAGGGG 1200  
**E T I I V F H S L L T G S Y A N R Y G G** 349  
 ATCCACTACTTCTGTTTCCCTGGGACTCGGAAGAGATGATTTTCAACTTGGCA 1260  
**I H L L F P W D Y G M E E M I F N L A** 369  
 GACACATCTATTTTCAATGACCTAGAAGGTGTGACCAAGTCCATATAGATGATGT 1320  
**D T H L F F N D L E E C D Q V L H I D D V** 389  
 TCATCAGACGACAACGCCAGGACCTGAGCACATAACAATTTGGAAGAGATGGCTTTCC 1380  
**S S D D N G Q D L S T Y N F G R D G F P** 409  
 GCTGCAGCCACAGTGTAAATTTATGCTGGCACTGGTGTCCGAGGTGGTGGACTGG 1440  
**A A A T S A N L C L A T G V R G G V D W** 429  
 ATCGGAACTGGCCTTCCGCTACAGACGAGTAAAGAGATCTACAACACTACAATAAAC 1500  
**M R K L A F R Y R V R K E I Y N T Y K N** 449  
 AAGTGGGAGTCTGCTTGGCCACTAAGAGGGACCGCTGGCTCCAGTCCAGGCTGAG 1560  
**K V G G L L G P A K R E A W L Q L R A E** 469  
 ATTGAGGCATCAGACTCCTGGCTGACCCGCTGAAAGCCCTCTCCCTCATCCAC 1620  
**I E A L T D S W L L K A L S L I H** 489  
 TCCCGGACGAAGTGTGAATATTTAGTAACTACGACGCTCAGCCAGCATTGGCA 1680  
**S R T N C V N I L V T T T Q L S P A L A** 509  
 AAAGTCTGCTATATGGATTAGGAATGTGTTTCCAATAGAAAATATTTACAGTCAACT 1740  
**K V L L Y G L G I V F P I E N I Y S A T** 529  
 AAAATAGGAAAGGAAAGCTGTTTGGAGGATAATCCAAAGGTTTGAAGGAAAGTGGTA 1800  
**K I G K E S C F E R I I Q R F G R K V V** 1860  
 TACCTTCTCATAGGAGATGGTGTGAAGAAGAGCAAGGGCAAAAAAGCATGCTATGCC 1549  
**Y L L I G D G V E E E Q G A K K H A M P** 569  
 TTCTGGAGGGTCTCCAGTCCAGTCCGACCTCATGCATCATGCTTGAATTAGAG 1920  
**F W R V S S H S D L M A L H A L E L E** 589  
 TACCTGTAACAGCTTCTCCCAACTTGACACTGCACAACTGCCCTGTGGCCAGAGATAAC 1980  
**Y L** 591  
 CCAGCAGCTTGTCTTCTTGTGTCAGTCTGGACTCAGAGTATACAAATTCAGCATAT 2040  
 GGATGCATAGCTGCTGCGGGCTTACTGCTAGCCCTCGGGTTAATGGAGGACCATGTGT 2100  
 ATTCTCAGAACAGCTGTTGACTCTAGTACTGTGAATCCAGTGAAGTAAGCCATGAGAA 2160  
 TGTCTCACACAGTGTGGTGTGCTTGGCTAGATTAACTACAT 2203

**B**

CTAAAGCGGGACGACTCTGCCTGTGCGGGTACAAGGCAATGTTAGAAGTGGTGACCTCA 60  
 L K R D D S A L C G Y K A M L E V V T S 7  
 CCCAGCCTCGCAACAAGCAGTACTGGAGCGGACCGGTCTGCCGTGGGGACGCTGAGT 120  
 P S L A T S S D W S E H G A A V G T L S 27  
 GACAGGGAAGGCATCGCAAAATCAGCGGCTCTGAGTGTGCCCTCAGCTCTTTGTGAAGTCT 180  
 D R E G I A K S A A L S V P Q L F V K S 47  
 CATCCACGTGTCCTCTGGTCACTCTCCACAGCCATGGCGGCTATGGCCAGACACAG 240  
 H P R V P P G Q S S T A M A A Y G Q T Q 300  
 TACCCACAGGCATTCAGCAGGCACCCTATACAGCGTACCAACTCCGCGCAGCC 67  
 Y S T G I Q Q A P P Y T A Y P T P A Q A 87  
 TATGGAATCCCCCTTACAGCATCAAGACAGAAAGCGTTTGAATCACTCCCCAGCCAG 360  
 Y G I P P Y S I K T E D G L N H S P S Q 107  
 AGCGGGTCTCTGAGCTATGGACCGAGCTTCAGCACCOCGCTGTGGACAGAGCCCTAC 420  
 S G F L S Y G P S F S T A P A G Q S P Y 127  
 ACCTACCCCGTGACAGCAGCCGCTGGGCTTTTCAAGGCGCAACGGACTGACCAACACC 480  
 T Y P V H S T A G L F Q G A N G L T N T 147  
 GCTGGATTGGGAGCGTGCACCAGGATATCCGCTCTACCCAGCTTTTACAGAACCCAG 540  
 A G F G S V H Q D Y P S Y P S F S Q N Q 167  
 TACCCAGTATTTACGCCATCATAACCCGCTACGCTCCCTGCCAGCAGCCTCTGC 600  
 Y P Q Y F S P S Y N P P Y V P A S S L C 187  
 TCTCGCCCTTCCACAGTCCACTACGCTCCAGGAGGCTCCACAAATGTCCCCAGC 660  
 S S P L S T S T Y V L Q E A P H N V P S 207  
 CAGAGTTCAGTCCCTGGCGGAGACTACAACACACAACCGACCTCCACACACAGCA 720  
 Q S S E S L A G D Y N T H N G P S T P A 227  
 AAGGAGGTGACACAGAGGCCACATCGAGCTCCGATGGGAAGCTACGGGGCCGGTCA 780  
 K E G D T E R P H R A S D G K L R G R S 247  
 AAGAGAAATAGTGACCTTCCCGCAGGAGACAAATGAAATCGAGCGGTGTCTGCTGG 840  
 K R N S D P S P A G D N E I E R V F V W 267  
 GACCTGGACGAGACAATCATTTTCACTCCCTGCTCACAGGACGTTTGCATCCAGA 900  
**D L D E T I I I F H S L L T G T F A S R** 287  
 TAGCGGAAGGACACACAGCCTCTGTGCGCATTTGGCTGATGAGGAGAGATGATCTTC 960  
**Y G K D T T T S V R I G L M M E E M I** 307  
 AACCTTGTGACACACCTGTTCTTCAATGACCTGGAGGACTGTGACCAAAATCCACGTG 1020  
**N L A D T H L F F N D L E D C D Q I H V** 327  
 GATGATGTCTATCCGATGACAATGGTCAGGATTTAAGCATATAACATTTCTCCACTGAT 1080  
**D D V S S D D N G Q D L S T Y N F S T D** 347  
 GGCTCCACAGCAGCGGCCAGGACGCTTGTGCTGGGTACAGTGTTCATGGCGGT 1140  
**G F H S T A P G A S L C L G T G V H G G** 367  
 GTGACTGGATGAGGAATCGGCTTCCGCTACTGCTGTGTGAGGAGATGTACAACACC 1200  
**V D W M R K L A F R Y C R V K E M Y N T** 387  
 TACCGAACACGTTGGGTGGCTGTAGTGTCTCCAAAAGAGAGACCTGGCTGCAGCTG 1260  
**F R N N V G G L I G A P K R E T W L Q L** 407  
 CGCGCCGAGCTGGAGCCCTGACTGACCTCTGGCTCACCCACTCCCTGAAAGCCCTCAAT 1320  
**R A E L E A L T D L W L T H S L K A L N** 427  
 CTCATCAACTCTCGACCAACTGTGTCAATGTGTTGGTCAACCCACGCAACTGATCCCT 1380  
**L I N S R P N C V N V L V T T T Q L I P** 447  
 GCATGGCCAAAGTCTGCTGTACGGTCTGGGCTCCGTTTCCCATCAGAGAATCTAC 1440  
**A L A K V L L Y G L G S V F P I E N I Y** 467  
 AGTGCACCAAGACAGGCAAGGAGTCTGTTCAAGAAATCATGAGAGATTTGGCCGC 1500  
**S A T K T G K E S C F E R I M Q R F G R** 487  
 AAAGCTGTACATTTGATAGGCGAGGGTGTAGAGGAGAGCAAGGAGCCAAAAGCAC 1560  
**K A V Y I V I G D G V E E E Q G A K K H** 507  
 AACATGCCTTTCTGGAGGATATCTGTGATGCTGACTAGAGCTCTAAGGCATGCCCTG 1620  
**N M P F W R I S C H A D L E A L R H A L** 527  
 GAATGGAGTATCTATGACAGTGGGACCGCAGCCACCCTGCCACCCACGACCCAGCC 1680  
**E L E Y L** 532  
 CCTGTCTATCTATACCATGAGGGCCCTAGACACCAAGAACTAGCTAGGGGCTCTATACC 1740  
 TAGGGGACATGTTCCACCGCCATTTAGAAAGTGTCTTCTTCCCTTGGGGACGGAGTTCG 1800  
 GACTCTGATATGAAACCCAGAGACCCAAATGAGGGCGCCCACTGCTCTGTTCTCTCTT 1860  
 TTTAATTTATGACTGCACCCGTTACTCCCATTACCACCGGTCCTTGTGCTTTCTCGG 1920  
 CTGATGTTGTTTCCGGTGGTGTAGTACCCAGTTTGTGTTTACGGGCAAAATCTTCTCT 1980  
 GGGCGTGGCGAGGAGGTGGTGTGGGGCTGTGGGGAAGCCCGATGTCATGTGGACAGT 2040  
 TGGCTGCTTATGCCCATCTTGTGTTGAGGAGAGGGAACTCTGGGAAGGCAAGGGT 2100  
 ACTCGGCATGATGGATAAAGGCATTCATATAAACCCAGCTTTACATTTAAAAA 2160  
 AAAAAAAAAAAAA 2173

**Fig. 1.** Nucleotide and predicted amino acid sequences of mouse *Eya1*, *Eya2* and *Eya3* cDNAs. (A-C) The 271 C-terminal amino acids (boxed and in bold) define the highly conserved Eya domain (see E). The GenBank Accession Numbers are: *Eya1*, U61110; *Eya2*, U61111 and *Eya3*, U61112. The assigned initiation codons are shown in bold. The ATG for *Eya2* is only assigned provisionally because the relevant ORF does not contain a 5' termination codon. For secondary structure predictions, potential nuclear localization signals and other features, see the Genbank Accession entries. (D) Northern blot analysis of *Eya1*, *Eya2* and *Eya3* transcripts. Sizes are indicated in kb.

C

```

AGACGGCTGCAGACACTGCAATTCAGTCCCCCTAAGTGTGTTAGGAGATAGTCGCTCCTCAT 60
GGAAGAAGAGCAAGACCTACCAGAGCAACCGTCAAGTAAACAACCCAGATGCCAGTGTATG 120
AGAAGCCTGAGACATCCAGCCTTGCCTCAAATCTCAGCATGTCCAGAGAAAATATGACAT 180
GCACCGATTACCTCCCTCGCTCATCCAATGATTATACCTCACAATGTATTCTCGCAAACT 240
M I I P H K C I L Q T 11
TCAAGCACAATGCCAGCCTGATACCACCTTCATCTGCAATTGCCAATATTTCCAGCAGCA 300
S S T N A S L I P T S S A I A N I P A A 31
GCTGTGGCCAGCATCTCAAACAGGATTATCCCACCTATACTATTCTTGGACAGAATCAG 360
A V A S I S N Q D Y P T Y T I L G Q N Q 51
TACCAGGCCTGTACCCCGAGTCCAGCTTTGGAGTCACAGGTCCAGACTAACAGTGTATGCT 420
Y Q A C Y P S S S F G V T G Q T N S D A 71
GAGACCACAACATTAGCAGCTACAACATACCAGACGGGAAGCCTAGTGTATGGTGCCT 480
E T T T L A A T T Y Q T E K P S A M V P 91
GCACCAGCCACACAGAGGCTTCCCTCCGACTCCTCTGCAAGCCTACCTTTGTCCAGACT 540
A P A T Q R L P S D S S A S L P L S Q T 111
ACACCAAAATAAGATGCTGATGATCAGGCCAGGAAACACTGACTGTCAAGAACCAGGGGC 600
T P N K D A D D Q A R K N M T V K N R G 131
AAGAGGAAAGCTGATGCCAGCTTCCAGCAGCAGTGAATGGACGGGTATTTCTCTGG 660
K R K A D A S S S Q D S E L E R V F L W 151
GACTTGGACGAAACCATCATCATCTTTCATCCCTCTCACTGGATCCTATGCTCAGAAG 720
D L D E T I I I F H S L L T G S Y A Q K 171
TATGGAAAGGCCCAACAGTAGTAATGGCTCAGGTTTAAACCATGGAAGAAATGATTTTT 780
Y G K D P T V V I G S G L T M E E M I F 191
GAAGTGGCTGATACATCTATTTTTCAATGACTTAGAGGAGTGTGACCCAGGTGATGTG 840
E A D T H L F L E A D D Q V V H V 211
GAAGATGTGGCTTCTGATGACAATGCCAGGATTGAGCAACTCAGTCTTCCACAGAT 900
E D V A S D D N G Q D L L S N Y S F S T D 231
GGTTTCAGTGGTTCAGGAGCAGTGGTAGCCAGGTTTCACTCTGTGGGCGTTCAGGAGGT 960
G F S G S G G S G S H G S S V G V Q G G 251
GTGGACTGGATGAGGAACTGGCCTTTCGCTACCGAAAAGTGAAGGAAATCTATGACAAG 1020
D W M R K L A R Y R K V R E I V I D K 271
CATAAAGCAATGTGGTGGCTCCTCAGCCCCAGAGGAAGCAAGCTGCAGAGACTC 1080
H K S N V V G G L L S P Q R K E A L Q R L 291
AGACAGAGATCGAGGTGCTGACCGACTCCTGGTTAGGAAGTCCGCTCAAGTCCCTGCTT 1140
R A E I E V L T D S W L G T A L K S L L 311
CTCATCCAGTCTCGAAAGAACTGTGCGAATGTTCTGATCACTACCAGCAGTGGTTCOA 1200
L I Q S R K N C A N V L I T T T Q L V P 331
GCCCTGGCAAGGTTCTCCTGTATGACTAGGAGAGATATTTCTATTGAAAACATCTAC 1260
A L A K V L L Y G L G L E I F P I E N I Y 351
AGTCTACCAAAATCGTAAAGAGAGCTGCTTTGAGAGAAATGTTTTCGAGGTTTGGGAAA 1320
S A T K I G K E S C F E R I V S R F G K 371
AAAAGTCAATGTAGTGAATGGAGTGGACAGATGAAGAAATGCAAGCAAGCAGCAG 1380
T T Y V V I G D G R D E I A A K V Q H 391
AACATGCCCTTCTGGAGGATCAAAACCCAGGAGATCTGGTGTCCCTGCACCAGGCTTTA 1440
N M P F W R I T N H G D L V S L H Q A L 411
GAGTTCAGCTTCTCTGAGAACTGGAATGGAGCCCTTCCCTTCTGTGAGCTTCTCTTT 1500
E L D F L
ACCTTCAAACAGGAGCCAGAGCCAGAACCCCTCTGAGCCCTTCTCTCTGTCTGTCTC 1560
GGGCTCAGTGGCCCTCCCTCTCTCTCTCTCTCTCTCTCTCTCTCTCTCTCTCTCTCT 1620
AGAACAATCAGAACCAACAACCTCAGTATTCTGAGTGTGAGCTGCAGCCATGTTCCT 1680
GTACAGCAAGAGGTTGGCTGGATAGAGCTGCAGACCCGCTGCCCTACCGTCTTAAATTT 1740
TCTGTTTCAATTAAGAAAGGAGAAACAAGAAAGCCGAGCTTGGCCACAGTGTACTCT 1800
TGCTCGATGACGGACTGACCCGGAGCTGCTCCTGATGTTGTGGATGGAACCTGCCCTT 1860
GAGATCGTCTCTGGTCTCTAGCTATAGAAATGCTCTCCAGTGAATGGGTATGTTAT 1920
TTTATAGTGGAGGCTTGGCTTACAGCAGCTCCTCCCACTTTCTATGAAAGAAAGCCG 1980
TGTGTAAGTTCCTGGACAGTAGTAATGGAATATCTAAAATCCTCCGTGACTGACAG 2040
GACAGAGGCTCCAGTGTCTGTCTCCCTGGGAGGCTCCTTGCATCTCAAGCCCTGCT 2100
CACTTATTTAGACTGTGGCATCTCCATCTTGTAGCCTCGTCTCCTTGGCAGTGTCT 2160
CTTCACTGTAACATAAATGGCAACAACCTGGAACCTCTCCATAGACAATAAATCTAA 2220
GCCTTATGCTGTACTTCAGAAAGTCTGTGCCAGGAGCTCAGCCTCCAGACTGGAGAGA 2280
AGGGCTCAGATTTCTTAGGACTTTCACCTCTGCTCTGCAAGCAGTACCTGTTCCAG 2340
CAGATGCTTCTCTGTGGTGGCTCAGTGTGATGCTGGCCTCAGTCTCTGTCTCAC 2400
AGCTACCTGTCTGTGCACTCTGGCCAGCCCTACCCACTCATTGCAAGTCAAGAAAG 2460
CCAAGGGGCGAGGCTTAGCTGCCTCTCACTGCACCTTACATGCGGTGATCCCGCCT 2520
GTATTTATACAGATCTCTGCCTACGAGTGGAGAGCAGAGCTAGAGTCAAAACCCATGA 2580
AATATCCCACTGCTTAGAGTCCATGCTGAAGTGGGAAACAGGCCAGAAAGACTTTCTTG 2640
ACTTAAGTCTTAAAAATAACAATCCCTGAGTGTGCAAGAGCACCTCTCAAGGCTGCC 2700
TAGTCACTCAGGAGGAACTGGCCCTTAGTGCCAGCCGCAAGCCAGCTGTGTTTGG 2760
TTTATTTGGTTTTGTGTTGGGTTTGTGTTGTTTTCAGGCACTATCCCTTCAGGA 2820
CCAATGTCCGCTGCTGTTAAATTTGGTTAAAGCTCCTTAGAGTGGAGAAATGTGCAGCC 2880
TTGGTCTTCAGGAGGCTTGGACCAACCCCTAGCTATAGTCACTGTCCGAGATACCACA 2940
GCCAGAGGCAAAATTCCTTTCATGTAGGCTACAGATAACAGCAGGAGGCTGAGCA 3000
CCACCTCAGGACTGTTGACGCTTCTGAGTCTTCTGAGACCAGCAGTGGAGGAGGGCC 3060
TCAGACAGGAGTGGAGTTGTGTCTGGCCATTCATTTGGCTTTGTTGTGAGGTAAGT 3120
GTGGGAAAGAGAGCTAGAGTCTAAGTCAAGCCTCCTAGGCTGCCATTAGCACCACAG 3180
CGTACTAGTCTAGCCGCTTGGTGGTGGTGGTGGTGGTGGTGGTGGTGGTGGTGGTGG 3240
TTTACTTCAAGTCTCAGTCTTCCCTCATTAACAGTGGAGTTCCTTGTGCTGGACAAG 3300
CCACCTATTAGTGTCTGTGCTCAGGCTCACCAGTCCCAAGTGGCGACACCCCTTCT 3360
CACACAGGTACCACCACAACAACCTCTGAGTCTTCTTAGATATAACAGGATTAATCC 3420
CTTCTCTTGGCCCTGACTGGAGAGGCAAGGAGTGTCTGAGCTGAGTGGCTACTGTT 3480
CCAAGCAGCTACCTGTCCAGGTAGACAGAGGATGCTTGTGCTCTCCAGGACTCC 3539

```

D

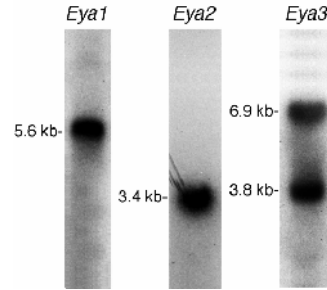

only in head and branchial arch mesenchyme, and in the brain, limb, eye and all rhombomeres (Figs 3E,F, 4E,F and data not shown). In the E9.5 eye, *Eya3* is expressed in the optic vesicle and perioptic mesenchyme but is absent from the lens placode; by E10.5, *Eya3* is expressed in the lens vesicle and neuroretina (data not shown). Thus, whereas either *Eya1* or *Eya2* is strongly expressed in all cranial placodes, *Eya3* is not expressed in the placodes at all. Except for the tissues mentioned above, *Eya3* expression is restricted to craniofacial and branchial arch mesenchyme, and in fact appears concentrated in regions underlying or surrounding the cranial placodes (Fig. 4E,F).

**Eya1 and Eya2 are expressed with Pax6 in lens and nasal placodes**

The expression of *Eya1* and *Eya2* in lens and nasal placodes coincides with *Pax6* expression (Fig. 5). *Eya1* begins to be expressed in lens placodal ectoderm at E9.5, after the optic vesicle and overlying surface ectoderm make contact, and then becomes more strongly expressed as the ectoderm thickens (Fig. 5A). *Eya2* expression, in contrast, is not detected in lens placode ectoderm at any time (Fig. 5B). *Pax6* expression in head ectoderm can be detected as early as E8.0 (Grindley et al., 1995), significantly earlier than *Eya1* expression. Thereafter, *Pax6* expression becomes restricted to the lens and nasal placode forming regions (Fig. 5C).

Similar to the co-expression of *Eya1* and *Pax6* in the lens placode, both *Eya1* and *Eya2* are strongly co-expressed with *Pax6* in the nasal placode (Fig. 5D-F). *Eya* expression in the oral ectoderm is first detected just before the ectoderm thickens, but after the onset of *Pax6* expression (data not shown). *Pax6* expression thus overlaps with but precedes that of *Eya1* and *Eya2* in the lens and nasal placodes.

**Eya1 and Eya2 are expressed in overlapping or complementary patterns during CNS and craniofacial development and organogenesis**

Within the CNS, high levels of *Eya1* and *Eya2* transcripts could be detected in many parts of the brain, including the ventricular zone (VZ) of the developing forebrain and hindbrain at E11.5-12.5 (Fig. 6A,B,E,F). In the developing spinal cord, *Eya1* is weakly expressed in the dorsal neural tube and floor plate, whereas *Eya2* is strongly expressed in the dorsal neural tube but absent from the floor plate (Fig. 6C,D).

In the craniofacial region, *Eya1* and *Eya2* show complementary expression patterns. At E11.5-12.5, *Eya1* is strongly expressed in craniofacial mesenchyme, whereas *Eya2* is strongly expressed in the overlying epithelium (Fig. 6C-F). In

**Fig. 1 continued.** (E) Sequence identity of the *Drosophila* and murine *Eya* gene products. Note that the 271 amino acid *Eya* domains have sustained a 3-residue deletion with respect to the 274 amino acid *Drosophila* *Eya* domain. The *Eya* domains are shown in black, along with the percent identity to the *Drosophila* *Eya* domain. The N terminus and the number of amino acids for *Eya2* are indicated with an asterisk to indicate that the initiation codon has not been definitively assigned. Sequence identity of the murine N-terminal domains to the *Drosophila* *Eya* gene product drops to 20–30%. (F) Amino acid sequence alignment of the *Eya* domain, defined by the C-terminal 271 amino acids encoded by the murine *Eya* gene products. Residues identical to the *Drosophila* protein are indicated by dashes. Residues conserved between two or more murine genes are indicated in **bold**.

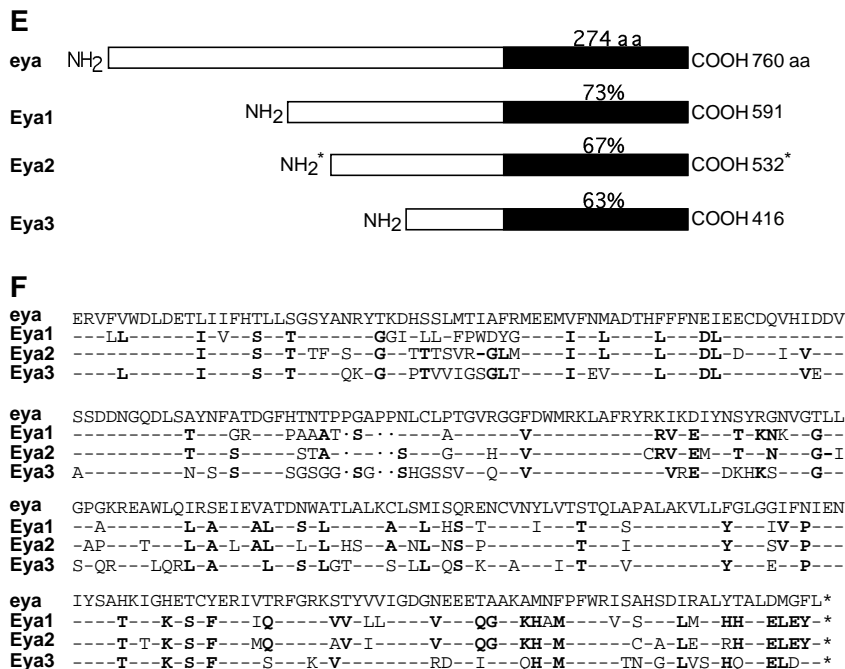

the developing tooth, *Eya1* is expressed in the dental mesenchyme at E12.5, while *Eya2* is expressed in oral ectoderm including the dental lamina at E11.5 and the developing tooth bud at E12.5 (Fig. 6C,D). From E12.5 to E14.5, both genes also show complementary expression in the whisker follicle (Fig. 6E,F). *Eya1* transcripts are distributed in the condensed mesenchyme surrounding the developing whisker follicle, whereas *Eya2* transcripts are abundant in the ectodermal component of the follicle (Fig. 7A,B).

Expression of both *Eya1* and *Eya2* is also detected throughout organogenesis in overlapping or complementary patterns. At E11.5–14.5, high levels of expression of the *Eya* genes were detected in the prevertebrae. *Eya1* transcripts were first detected in the precartilaginous primordium and later strongly in the condensed mesenchymal blastema of the prevertebrae, whereas *Eya2* transcripts are localized in the mesenchyme outside the blastema in the region fated to become intervertebral disc, and in the future intercostal muscles (Fig. 7C,D). *Eya1* and *Eya2* also show differential expression in the gut. Gut mesenchyme expresses *Eya1* strongly, while *Eya2* is expressed in the endoderm; both genes are expressed in an asymmetric, dorsoventrally graded fashion (Fig. 7E,F). Both genes are also strongly expressed in the developing kidney and genital tubercle (Fig. 6E,F). In the developing limb bud, both *Eya1* and *Eya2* are expressed in myogenic and connective tissue progenitors (data not shown). The expression of *Eya1* and *Eya2* during organogenesis, often in adjacent tissue layers, suggests a general function in inductive tissue interactions.

### *Eya1* and *Eya2* are differentially expressed in the developing eye and nose

*Eya1* and *Eya2* are differentially expressed during eye and nasal development in a highly dynamic fashion. Subsequent to lens placode invagination, *Eya1* expression is maintained in the lens vesicle and optic stalk, and appears in the outer layer and at the peripheral margin of the bilayered optic cup (Fig. 8A,B). The

outer layer of the optic cup will differentiate into retinal pigment epithelium while the periphery will differentiate into the iris and ciliary body regions. Only low levels of *Eya1* expression were detected in the neural retina. In the lens, beginning at E12.5, *Eya1* transcripts become progressively stronger in the anterior

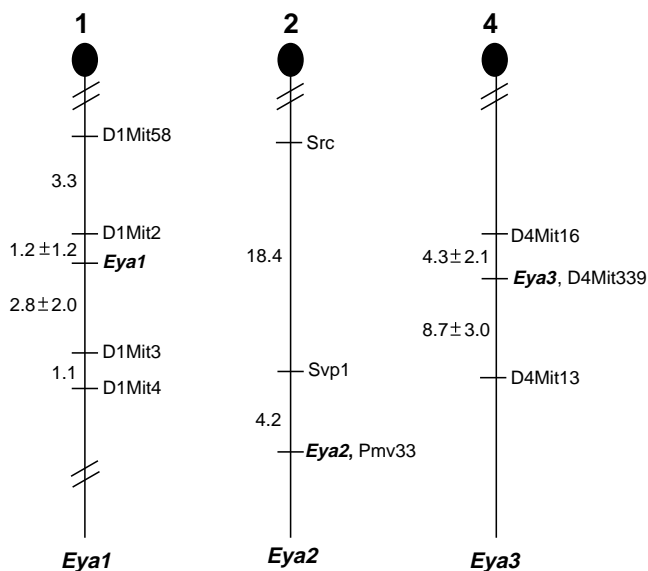

**Fig. 2.** Chromosomal mapping of *Eya1*, *Eya2* and *Eya3*. Partial linkage maps showing the location of *Eya1*, *Eya2* and *Eya3* in relation to linked markers, with recombination frequencies in centimorgans (cM). Human homologues of mouse genes flanking *Eya1* have been mapped to human 8q11.2 (*Oprk1*) and 6q13 (*Col9a1*). A presumptive human *Eya2* orthologue (93% identity over 123 amino acids with mouse *Eya2*) has been mapped as an EST to 20q13.1 (Banfi et al., 1996). Human homologs of mouse genes flanking *Eya3* have been mapped to 1p32–35 (*Lck*) and 1p36.1 (*Pax7*).

epithelial layer and fainter in the lens fiber cells (Fig. 8B,C). Later on at E16.5, *Eya1* expression is observed in the surface ectoderm destined to form cornea (data not shown).

In contrast to the expression of *Eya1* in anterior ocular structures, *Eya2* expression is restricted to posterior parts of the developing eye. These include the neural retina and prospective sclera (Fig. 8D-F). In the neural retina, *Eya2* expression was first detected at E11.5 in retinal progenitor cells in the central retina (Fig. 8D). From E12.5-14.5, the expression of *Eya2* becomes restricted to the inner nuclear cell layer of the retina, and is specifically excluded from the peripheral neural retina where *Eya1* is expressed (Fig. 8E,F). The complementary nature of *Eya1* and *Eya2* expression extends to additional ocular structures. Whereas *Eya1* is strongly expressed in the optic nerve, *Eya2* is excluded from the nerve and is expressed in the surrounding optic nerve sheath; both genes also appear to be differentially expressed in extraocular muscles (data not shown). The expression of *Eya1* and *Eya2* suggests that these genes function in multiple steps of ocular development.

*Eya1* and *Eya2* are also expressed during nasal development. Subsequent to nasal placode formation, expression of both genes in the developing olfactory epithelium continues during the formation of the nasal pits and the vomeronasal (Jacobson's) organ, the latter a derivative of the olfactory placode (Fig. 9A-F). At E14.5, *Eya2* expression becomes noticeably weak in the anterior region of the olfactory epithelium whereas *Eya1* expression remains uniform (Fig. 9C,D). By E16.5, *Eya1* and *Eya2* show complementary expression within the olfactory epithelium (Fig. 9E,F). *Eya1* is strongly and uniformly expressed throughout the apical epithelial layer whereas *Eya2* expression is absent. In contrast, *Eya2* is strongly expressed in the basal epithelial layer where *Eya1* expression is either weak or absent. *Eya1* and *Eya2* appear to play general but distinct roles in patterning the olfactory epithelium.

***Eya1* and *Eya2* expression in lens and nasal placodal ectoderm requires *Pax6***

To determine if *Eya1* and *Eya2* expression in the prospective nasal and lens placodal ectoderm requires *Pax6*, *Eya1* and *Eya2* expression was analyzed in *Sey<sup>Neu</sup>/Sey<sup>Neu</sup>* embryos at E9.5. At E9.5, overt morphologic differences between wild-type and mutant embryos are not yet apparent. *Eya1* is expressed in wild-type prospective lens and nasal placodal ectoderm at this

stage, when the lens and nasal placodes are just beginning to form. In *Sey<sup>Neu</sup>/Sey<sup>Neu</sup>* embryos, *Eya1* expression in both the lens and nasal placodal ectoderm is markedly reduced (Fig. 10A-F). In contrast, the level of *Eya1* expression in the perinasal mesenchyme appears to be increased in *Sey<sup>Neu</sup>/Sey<sup>Neu</sup>* embryo (Fig. 10D). *Eya1* expression in the Rathke's pouch is also reduced in *Sey<sup>Neu</sup>/Sey<sup>Neu</sup>* embryo at E10.0 (data not shown). In wild-type embryos, *Eya2* expression at E9.5 is strongly detected in prospective nasal but not lens placodal ectoderm. In contrast, in *Sey<sup>Neu</sup>/Sey<sup>Neu</sup>* embryos, *Eya2* expression in the prospective nasal ectoderm is undetectable (Fig. 10G-J), similar to *Eya1*. *Eya2* expression in the perioptic and perinasal mesenchyme is not detectable in wild-type embryos; however, in *Sey<sup>Neu</sup>/Sey<sup>Neu</sup>* embryo, *Eya2* is ectopically expressed in the perioptic and perinasal mesenchyme (Fig. 10G-J). *Eya1* and 2 expression in other embryonic regions remains well preserved in *Sey<sup>Neu</sup>/Sey<sup>Neu</sup>* embryos (data not shown). Similar results for *Eya1* and *Eya2* expression in *Sey<sup>Neu</sup>/Sey<sup>Neu</sup>* embryos were obtained in six independent experiments involving wild-type and mutant embryos ranging from E9.0-10.0. We conclude that *Pax6* is

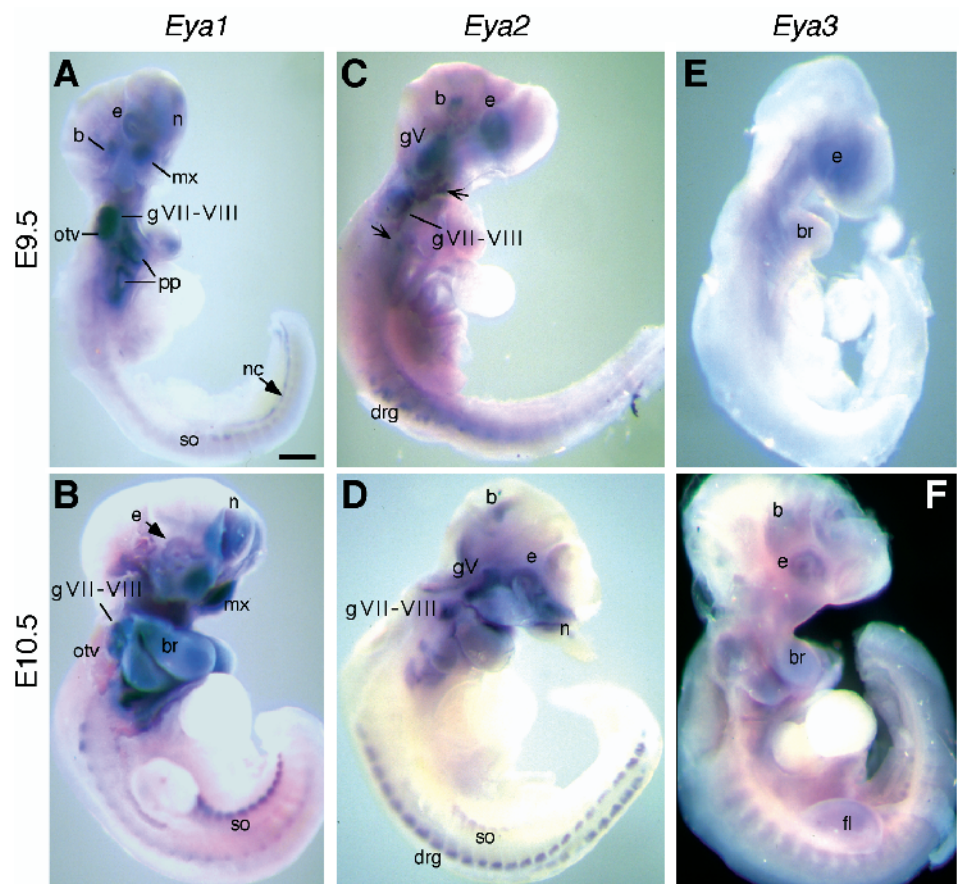

**Fig. 3.** *Eya1*, *Eya2* and *Eya3* expression in E9.5-10.5 mouse embryos. All three genes are expressed in the eye (e). Both *Eya1* and *Eya2* are expressed in the facioacoustic ganglionic complex (gVII-VIII), the epibranchial placodes (arrows in C; not shown for *Eya1*), the nasal placodes (n) and somites (so). *Eya1* and *Eya2* are also differentially expressed with *Eya1* in branchial arch mesenchyme (br), the pharyngeal pouches (pp) and otic vesicle (otv), and *Eya2* in branchial arch ectoderm, the trigeminal (gV) and dorsal root ganglia (drg). *Eya3* is expressed in the head and branchial arch mesenchyme (br), forelimb (fl), hindlimb and eye (e). Other abbreviations: b, brain; mx, maxillary component of the first branchial arch; nc, nephrogenic cord. Scale bar, 200  $\mu$ m.



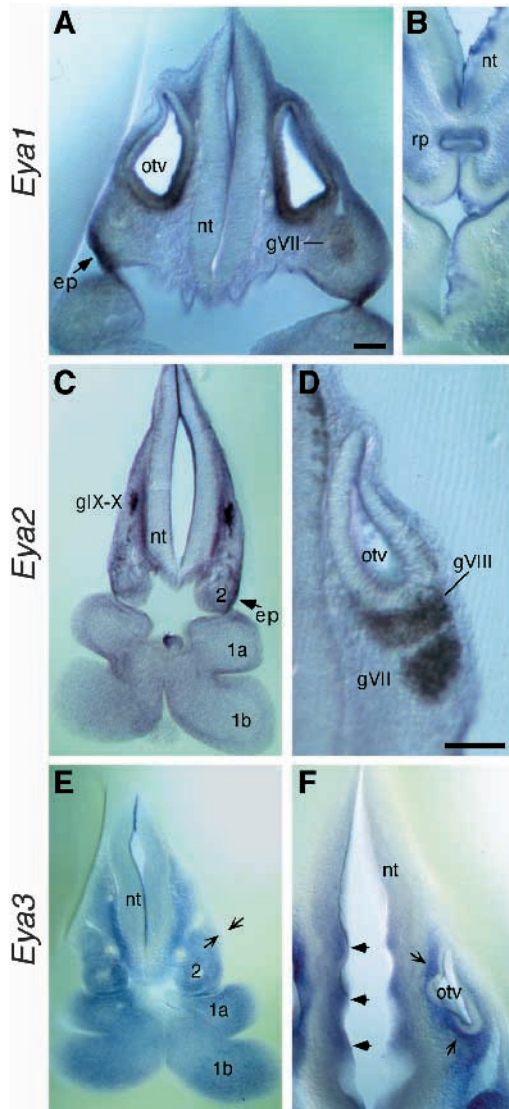

**Fig. 4.** *Eya1* and *Eya2* are expressed in cranial placodes and ganglia, while *Eya3* is expressed in mesenchyme. (A) *Eya1* expression in the otic vesicle (otv), epibranchial placode (ep, arrow) and facial ganglion (gVII) at E9.5, and (B) in Rathke's pouch (rp) at E10.5. (C) *Eya2* expression in the glossopharyngeal and vagus ganglionic complex (gIX-X), epibranchial placode (ep, arrow), and (D) in the facioacoustic ganglionic complex (gVII, gVIII) at E9.5. (E) *Eya3* expression in head and branchial arch mesenchyme at E9.5, and (F) in rhombomeres (arrowheads), and in mesenchyme surrounding the otic vesicle (arrows) at E10.5. Note that *Eya3* is excluded from craniofacial ectoderm (arrows in E) and largely excluded from the otic vesicle (F). Abbreviations: nt, neural tube; 1a, maxillary component of first branchial arch; 1b, mandibular component of first branchial arch; 2, second branchial arch. Dorsal is up. Scale bar, 200  $\mu$ m.

required for *Eya* expression in lens and nasal placodal ectoderm.

## DISCUSSION

*Eya1* and *Eya2* are widely expressed in cranial placodes and at sites of inductive tissue interactions during organogenesis,

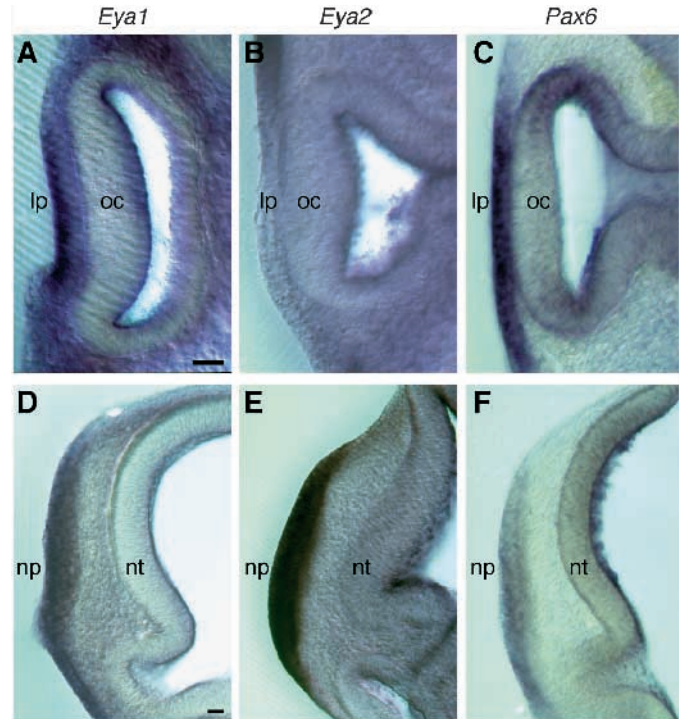

**Fig. 5.** *Eya1*, *Eya2* and *Pax6* are expressed in lens and nasal placodes. *Eya1* (A) and *Pax6* (C) are expressed in the lens placode ectoderm, while *Eya2* (B) is not. (B,C) The prospective lens ectoderm is at an early stage of placode morphogenesis, defined by contact between the optic vesicle and surface ectoderm without ectodermal thickening; (A) the prospective lens ectoderm is at a later stage of placode morphogenesis. *Eya1* is expressed later than *Pax6* and is only weakly expressed in the lens ectoderm at the early stage (data not shown). (D-F) *Eya1*, *Eya2* and *Pax6* are all expressed in the nasal placode at E9.5. At this time, the nasal placode has already thickened, anticipating the equivalent stage in the contiguous lens placode which lags behind by 6-12 hours. Abbreviations: lp, lens placode; np, nasal placode; nt, neural tube; oc, optic cup. Orientation: ventral is up. Scale bar: 50  $\mu$ m.

often in complementary or overlapping patterns. These features suggest major roles for *Eya* genes in the development of vertebrate sensory systems and organs. In addition, *Eya1* and *Eya2* require *Pax6* for their expression in lens and nasal placode ectoderm, supporting the molecular conservation of the insect and mammalian eye-forming regulatory hierarchies. Below, we consider the possible functions of *Eya* genes in cranial placode induction and in eye morphogenesis.

### The *Eya* genes may mediate induction of the cranial placodes

The cranial placodes arise as thickenings in head ectoderm adjacent to the neural tube, and comprise the anlagen of the vertebrate lens, nose, ear, anterior pituitary, precursors of the cranial sensory ganglia and, in fishes, the lateral line organ (reviewed in Verwoerd and van Oostrom, 1979; Nieuwkoop et al., 1985; Webb and Noden, 1993). The lens placode excepted, the cranial placodes differentiate into neuronal or endocrine cells, which comprise the respective sensory and endocrine organs and peripheral nervous system. The trigeminal, epi-



branchial and otic placodes provide mitotic neuroblasts, which delaminate from the ectoderm and coalesce with neural crest to form the sensory ganglia for the trigeminal (V), the glossopharyngeal (IX), vagus (X) and facial (VII), and the acoustic (VIII) nerves, respectively (D'Amico-Martel and Noden, 1983; Webb and Noden, 1993). Together, *Eya1* and *Eya2* are expressed in all cranial placodes, while *Eya3* expression appears concentrated in craniofacial mesenchyme surrounding the placodes. *Eya1* and *Eya2* expression in head surface ectoderm precedes and then coincides with the first morphologic stages of placode formation, and is maintained in placode derived structures up to and including E16.5, the latest stage examined for these structures (data not shown). Thus, *Eya* genes are likely to play a central role in mediating both the induction and differentiation of cranial placodes.

Previous studies on placodal development in amphibian embryos have suggested that the cranial sensory placodes may be induced by similar mechanisms, beginning with very early inductive events during mid-gastrula stages. Although differences exist between placodes with respect to ease of inducibility and onset and duration of ectodermal competence, one model suggests that initially a common placodal state is activated in a large region of head ectoderm (Jacobson, 1966; Nieuwkoop et al., 1985; Grainger, 1996; Gallagher et al., 1996). Subsequently, during neural tube formation, interactions with particular regions of the developing brain lead to the formation of different placodes in their appropriate location and association with neural tissue. The cranial placodes are thus formed by a series of inductors, with forebrain completing induction of the nasal placode, optic vesicle completing induction of the lens placode and hindbrain completing induction of the otic placode.

One molecule potentially involved in placode induction could be FGF3, which is

expressed in the hindbrain in rhombomeres r5 and r6 adjacent to the otic placode. FGF3 knockout mice exhibit normal otic vesicle development, but the adjacent epibranchial placode-derived VII/VIII cranial ganglia are reduced or absent (Mansour et al., 1993). In addition, experimental inhibition of FGF3 mRNA interferes with formation of the nodose (X) placode (Qin and Kirby, 1995). *Eya1* and *Pax2* are differentially expressed in the portion of the otic vesicle flanking the hindbrain, suggesting that their expression could depend upon

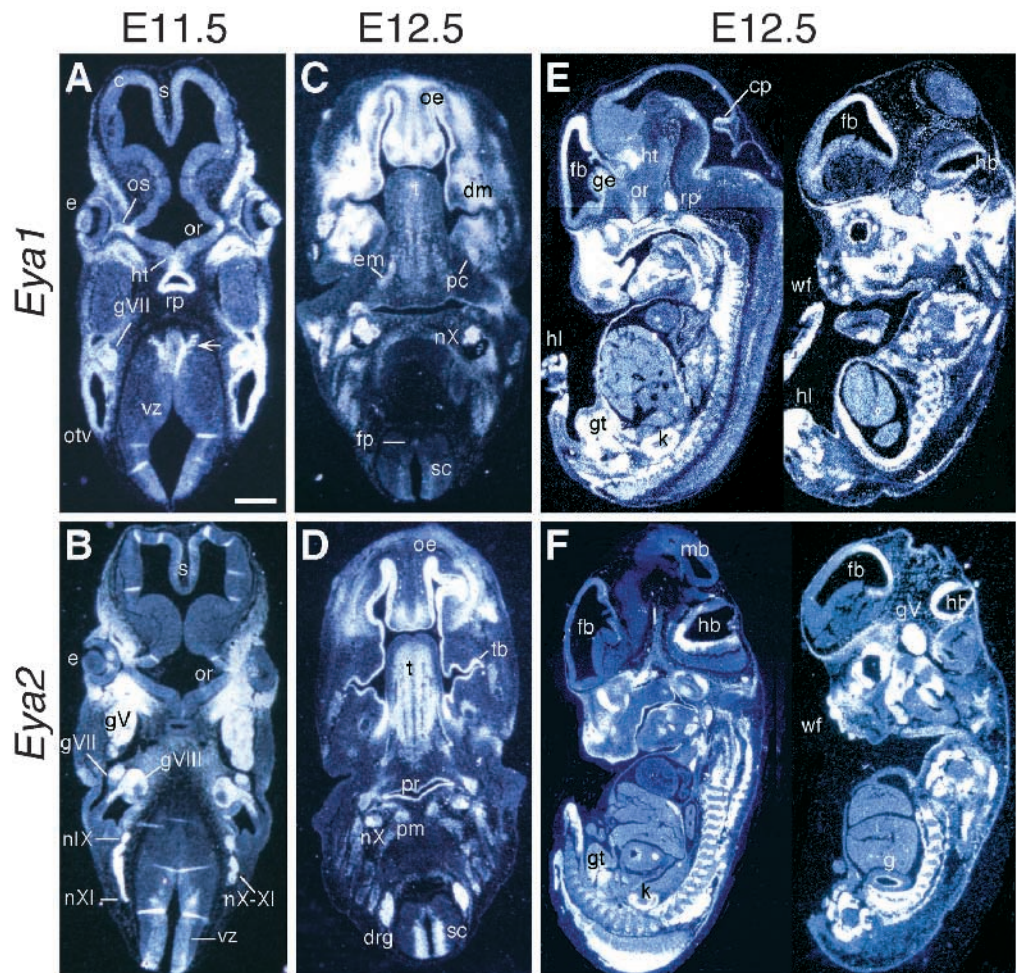

**Fig. 6.** Expression of *Eya* genes in the developing CNS and craniofacial region and during organogenesis. Transverse (A,C) and parasagittal (E) sections show *Eya1* expression in cerebral cortex (c), septum (s), ventricular zone (VZ) of the forebrain (fb), hindbrain (hb) and in motor neurons in the hindbrain (arrow in A), weakly in spinal cord (sc) and floor plate (fp), in the ganglionic eminence (ge), choroid plexus (cp), hypothalamus (ht), optic stalk (os), optic recess (or), eye (e), Rathke's pouch (rp), facial ganglion (gVII), vagus nerve (nX) and otic vesicle (otv) at E11.5-12.5. Expression is also seen in the intrinsic and extrinsic (em) muscles of the tongue (t), dental (dm) and craniofacial mesenchyme, and in the precartilaginous (pc) and the olfactory epithelium (oe) at E11.5-12.5. Transverse (B,D) and parasagittal (F) sections show *Eya2* expression in the septum (s), the ventricular zone (vz) of forebrain (fb) and hindbrain (hb), the spinal cord (sc), optic recess (or) and eye (e), in the trigeminal ganglion (gV), facioacoustic ganglia (gVII-VIII), glossopharyngeal nerve (nIX), vagus nerve (nX), cranial accessory nerve (nXI), and in intrinsic muscles of the tongue (t), tooth bud (tb), pharyngeal region (pr) and dorsal root ganglion (drg) at E11.5-12.5. *Eya2* expression is also seen in the prevertebral premyotome mass (pm) and in the olfactory epithelium (oe). Both *Eya1* and *Eya2* are expressed in vibrissal (whisker) follicle (wf), prevertebrae, gut (g), kidney (k), genital tubercle (gt) and limb bud. Data not shown: *Eya2* is strongly expressed in the developing thymus and proximal bronchial epithelium, whereas *Eya1* is expressed in distal bronchial epithelium. No expression of *Eya1* or *Eya2* was detected in the developing heart or liver. Other abbreviations: hl, hindlimb; mb, midbrain. Orientation in A-D: ventral is up. Scale bar, 400  $\mu$ m in (A-D) and 1000  $\mu$ m in (E,F).



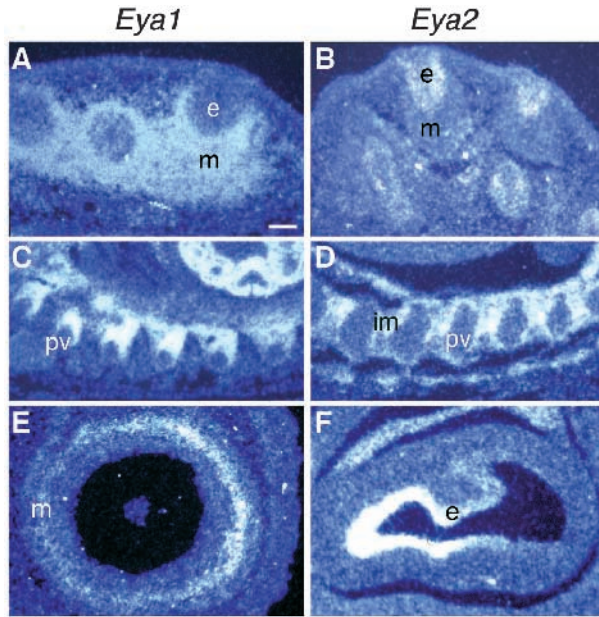

**Fig. 7.** Complementary expression of *Eya1* and *Eya2* during organogenesis. *Eya1* (A) and *Eya2* (B) expression in the E14.5 vibrissal follicle. *Eya1* is expressed in follicular mesenchyme (m), while *Eya2* is expressed in follicular epithelium (e). *Eya1* (C) and *Eya2* (D) are expressed in the anlage of the anterior vertebral body anlage (pv) and the future intercostal muscles (im), respectively. *Eya1* (E) and *Eya2* (F) are expressed in the gastric mesenchyme (m) and endoderm (e), respectively at E13.5; dorsal is to the left. Scale bar, 50  $\mu$ m.

a hindbrain derived signal (Nornes et al., 1990). Similarly, recent results suggest that an optic vesicle derived signal regulated by the LIM homeobox gene *Lhx2* acts to maintain

*Pax6* expression in lens placode ectoderm (F. D. Porter, personal communication). Thus, *Eya* genes may function along with *Pax* genes in a molecular pathway within the ectoderm which is activated or maintained in response to neuroectoderm derived signals.

It should be noted, however, that *Eya* genes could function at multiple steps during placode induction. For example like *Eya1*, *Eya3* is expressed during otic vesicle induction, but unlike *Eya1*, *Eya3* is not expressed in the otic vesicle. Instead, *Eya3* is expressed in the adjacent hindbrain rhombomeres and in the mesenchyme surrounding the otic vesicle. In potentially analogous fashion, *Eya1* is expressed in both the lens placode and the subjacent perioptic mesenchyme, and both tissue components are believed to interact during lens induction. Thus, while our results suggest a critical ectodermal function for *Eya* genes in mediating placode induction, they also support a broader function in regulating the general exchange of inductive signals between tissue layers during placode induction and organogenesis.

### Eye development depends upon similar *Pax6* regulated pathways in mammals and insects

In the *Drosophila* eye imaginal disc, *eya* controls a genetic hierarchy involving *eya* and *so* that is required for eye formation. In vertebrate eye development, *Pax6* function is required in head surface ectoderm for lens formation. To determine if the genetic hierarchy regulated by the insect and mammalian *Pax6* genes is conserved at the molecular level, we examined *Eya* expression in the prospective lens and nasal ectoderm in wild-type and *Sey/Sey* mutant embryos. We show that, in wild-type embryos, *Pax6* expression precedes that of *Eya1* in prospective lens placodal ectoderm. However, in contrast to wild-type embryos, *Eya1* and *Eya2* expression in lens or nasal placodal ectoderm of *Sey<sup>Neu</sup>/Sey<sup>Neu</sup>* embryos

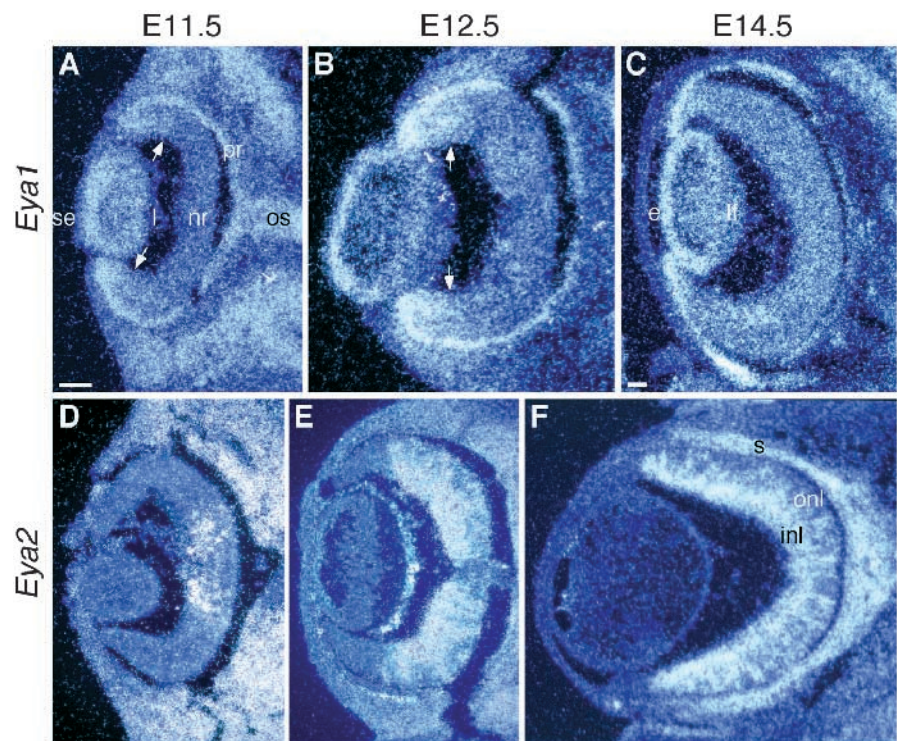

**Fig. 8.** *Eya1* and 2 are expressed in complementary patterns in the developing eye. (A-C) *Eya1* at E11.5-14.5 is expressed throughout the lens (l) and in the peripheral retinal margin which is destined to become the iris and ciliary body (arrows), in pigmented retina (pr) and optic stalk (os), and only weakly in the neuroretina (nr). At E12.5-14.5, *Eya1* expression in the lens becomes stronger in the anterior epithelium (e) and weaker in the lens fiber cells (lf). (D-F) *Eya2* at E11.5-14.5 is expressed in perioptic mesenchyme and in migrating retinal progenitor cells. By E12.5-14.5, *Eya2* expression strongly localizes to the inner nuclear layer (inl) of the retina but is excluded from the pigmented layer. *Eya2* expression is also observed in the sclera (s). Other abbreviations: onl, outer nuclear layer; se, surface ectoderm. Orientation: transverse sections, nasal aspect at top. Scale bar, 50  $\mu$ m.



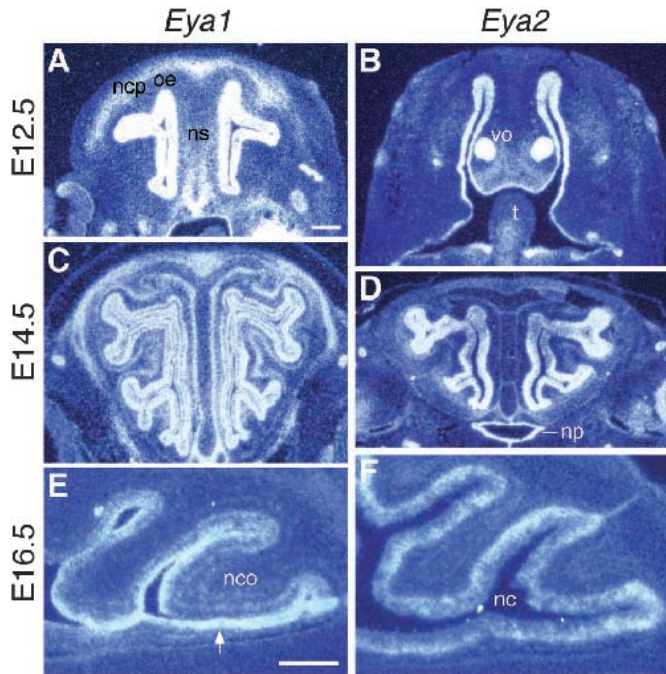

**Fig. 9.** Expression of *Eya1* and 2 in the developing nose. (A,C,E) *Eya1* is strongly expressed in the olfactory epithelium (oe), nasal septum (ns) and nasal capsule (ncp). (B,D,F) *Eya2* is strongly expressed in the olfactory epithelium and in nasopharyngeal ectoderm (np). The vomeronasal (Jacobson's) organ (vo) expresses both genes. (E,F) At E16.5, *Eya1* and *Eya2* show complementary expression in the olfactory epithelium. *Eya1* is strongly expressed in the apical epithelial layer (arrow) where *Eya2* is not expressed, while *Eya2* is expressed in the basal epithelial layer where *Eya1* is weak or absent. Other abbreviations: t, tongue; nco, nasal conchae. Orientation: ventral is up. Scale bar, 200  $\mu$ m.

cannot be detected. The marked reduction of *Eya1* and *Eya2* expression in the prospective lens or nasal ectoderm in *Sey<sup>Neu</sup>/Sey<sup>Neu</sup>* embryos establishes that directly or indirectly, *Pax6* is required for *Eya* expression in placodal ectoderm.

In *Drosophila* eye development, *so* appears to function downstream of *ey*. Similar to *Eya* and *Pax* genes, three mouse *so* homologues, *Six1-Six3*, are also expressed in the nasal, otic and trigeminal placodes and in Rathke's pouch (Oliver et al., 1995a,b); *Six3* expression is also detected in lens placode (S. Wawersik, P-X. Xu and R. Maas, unpublished data). In addition, *Eya1* and *Eya2* strikingly co-localize in mid-gestation mouse embryos with the expression of *Six* genes in brain, dorsal root ganglia, somites, kidney, limb, tendons and in various mesenchymes, suggesting that these genes function together in multiple developmental contexts. In *Drosophila* imaginal disc development, both *so* and *eya* reside downstream of *ey*, but *eya* is epistatic to *so* (Cheyette et al., 1994). Although *Six3* expression is maintained in some contexts in *Sey/Sey* mouse embryos (Oliver et al., 1995b), the striking similarity in *Eya* and *Six* gene expression during embryogenesis leads us to propose that different combinations of *Pax*, *Eya* and *Six* genes act within a hierarchical pathway similar to that employed in the *Drosophila* eye imaginal disc to specify individual cranial placode identities in vertebrate head ectoderm. Consistent with this, ectopic expression of the murine *Six3* gene in the Japanese medakafish, *Oryzias latipes*, transforms the otic placode into a lens placode resulting in a well formed but ectopic lens (J. Wittbrodt et al., personal communication).

It is worth considering the molecular implications of a *Pax-Eya* regulatory hierarchy. Besides the cranial placodes and developing eye, *Eya* and *Pax* genes are co-

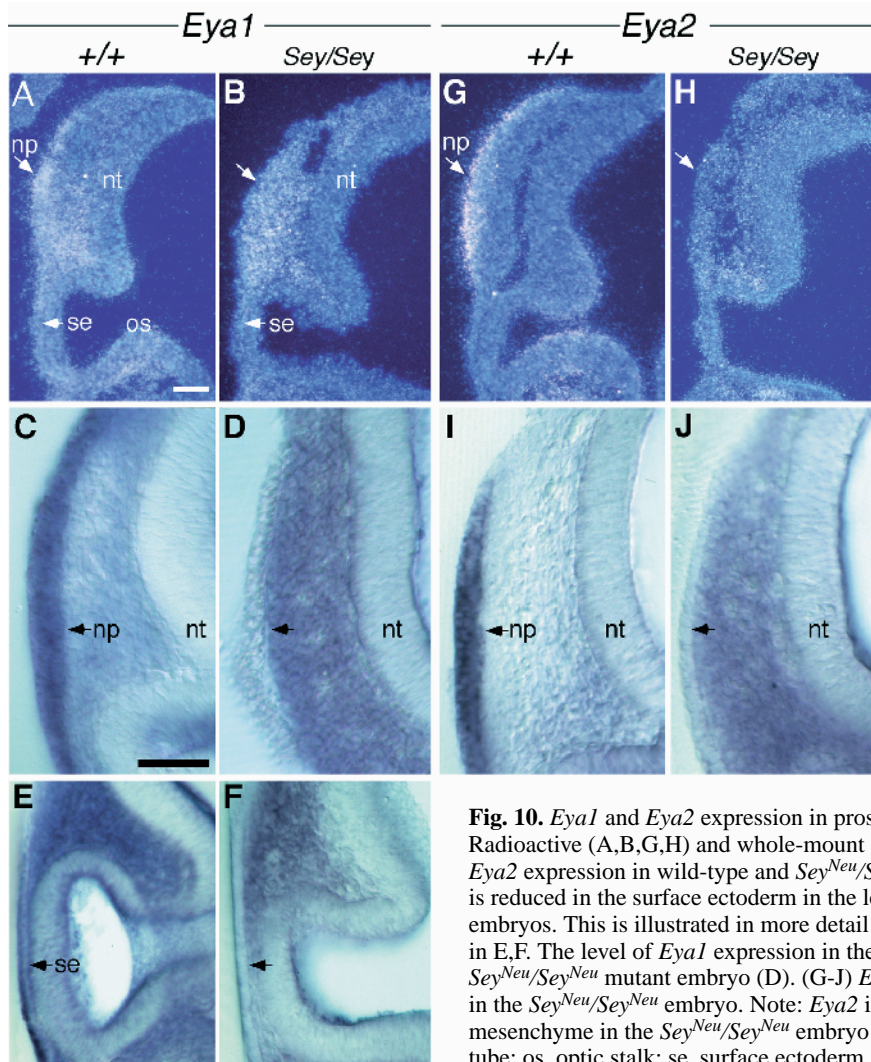

**Fig. 10.** *Eya1* and *Eya2* expression in prospective lens and nasal placodes requires *Pax6*. Radioactive (A,B,G,H) and whole-mount (C-F,I,J) in situ hybridization analyses of *Eya1* and *Eya2* expression in wild-type and *Sey<sup>Neu</sup>/Sey<sup>Neu</sup>* mutant E9.5 embryos. (A,B) *Eya1* expression is reduced in the surface ectoderm in the lens and nose forming region in *Sey<sup>Neu</sup>/Sey<sup>Neu</sup>* embryos. This is illustrated in more detail for the nasal ectoderm in C,D and the lens ectoderm in E,F. The level of *Eya1* expression in the perinasal mesenchyme appears to be increased in *Sey<sup>Neu</sup>/Sey<sup>Neu</sup>* mutant embryo (D). (G-J) *Eya2* expression is not detectable in the nasal ectoderm in the *Sey<sup>Neu</sup>/Sey<sup>Neu</sup>* embryo. Note: *Eya2* is ectopically expressed in the perioptic and perinasal mesenchyme in the *Sey<sup>Neu</sup>/Sey<sup>Neu</sup>* embryo (H,J). Abbreviations: np, nasal placode; nt, neural tube; os, optic stalk; se, surface ectoderm. Scale bar, 50  $\mu$ m.



expressed in many contexts, with *Pax1* and *Eya1* in the pharyngeal pouches, *Pax2* and *Eya1* in the optic nerve, otic vesicle and kidney and *Pax3* and *Eya1* and *Eya2* in the somites (Wallin et al., 1996; Dressler et al., 1990; Nornes et al., 1990; Goulding et al., 1994). For the regulation of *Eya* expression by Pax6 and possibly other Pax proteins to be direct would require that Pax proteins bind either distinct or a common DNA recognition sequence in the *Eya* genes. The latter hypothesis is plausible, since Pax2, Pax3, Pax5, Pax6 and *Drosophila* Paired can all bind to a similar DNA recognition sequence via the N-terminal subregions of their paired domains (Epstein et al., 1994, 1996; Chalepakis and Gruss, 1995; Czerny and Busslinger, 1995; Xu et al., 1995). It also could be possible that Pax6-*Eya* regulatory hierarchy involves additional factor(s), such as *dachshund* (*dac*), which is also involved in the *ey* controlled pathway in *Drosophila* (Bonini and Choi, 1995). *dac* is expressed in the eye imaginal disc, similar to *eya* and *so*, and encodes a novel nuclear protein required for early eye development (Mardon et al., 1994). Ectopic expression of *dac* can also direct ectopic eye formation (Shen and Mardon, 1977). Identification of vertebrate homologues of *dac* will further strengthen the idea that the early development of mammalian and insect eyes is under the control of similar genetic cascades.

The existence of a conserved molecular pathway involving Pax and *Eya* genes could be taken to suggest that vertebrate cranial placodes and insect imaginal discs, both ectodermal tissues, are phylogenetically related. Nonetheless, evolutionary considerations suggest that the retina may be more closely related to the eye imaginal disc than the lens. Development of both the vertebrate retina and the insect eye disc results in the genesis of rhodopsin-based photoreceptor cells, and the determination of cell fate in each relies similarly upon cell-cell interactions and intercellular factors. The overlapping expression of Pax6, *Eya2* and *Six3* in retinal cell progenitors suggests that a regulatory hierarchy similar to that in prospective lens ectoderm may also be utilized in retinal specification. In addition, *Drosophila* mutations in *ey*, *eya* and *so* each result in cell autonomous apoptosis in the unpatterned epithelium anterior to the morphogenetic furrow (Bonini et al., 1993; Ransom, 1979). While the function of *Eya2* in retinal patterning is unknown, some retinal functions of Pax6 are also executed cell autonomously (Quinn et al., 1996). These considerations suggest that *Eya2* may execute some functions of Pax6 in retinal specification.

Although the *Drosophila eya* gene product encodes a nuclear protein of unknown function, there are some clues to its function. The N-terminal regions of the murine and *Drosophila* Eya proteins are highly divergent, but resemble the proline-serine-threonine (PST) transactivation domains found in other transcription factors. Despite their sequence divergence, the Eya N termini could have retained a conserved molecular function. For example, the PST domain of Pax6 can function as a transactivation domain (Glaser et al., 1994) and, although the corresponding PST domain in Eyeless is highly divergent, both can be inferred to function equivalently in vivo (Halder et al., 1995a). The N-terminal PST domains of Eya may also encode a transactivation function. Although the *Eya* gene products do not possess a known DNA-binding motif, they could interact either with DNA or with a DNA-binding protein to activate transcription. Analysis of the Eya protein sequence suggests that the highly conserved Eya domain could mediate

such molecular interactions. This hypothesis can now be subjected to experimental test.

We thank Dr Nancy Bonini (University of Pennsylvania, Philadelphia) and Dr Jochen Wittbrodt (Max Planck Institute, Goettingen) for sharing results in advance of publication, Drs. Xianje Yang and Connie Cepko for the postnatal mouse eye cDNA library, and members of the Maas laboratory for critical reading of the manuscript. This work was supported by NIH grant 1R01 EY10123 (NEI). R. M. is an Assistant Investigator of the Howard Hughes Medical Institute.

## REFERENCES

- Banfi, S., Borsani, G., Rossi, E., Bernard, L., Guffanti, A., Rubboli, F., Marchitello, A., Giglio, S., Coluccia, E., Zollo, M., Zuffardi, O. and Ballabio, A. (1996). Identification and mapping of human cDNAs homologous to *Drosophila* mutant genes through EST database searching. *Nature Genetics* **13**, 167-175.
- Beier, D. R. (1993). Single-strand conformation polymorphism (SSCP) analysis as a tool for genetic mapping. *Mamm. Genome* **4**, 627-631.
- Bonini, N. M., Leiserson, W. M. and Benzer, S. (1993). The eyes absent gene: Genetic control of cell survival and differentiation in the developing *Drosophila* eye. *Cell* **72**, 379-395.
- Bonini, N. M. and Choi, K.-W. (1995). Early decisions in *Drosophila* eye morphogenesis. *Curr. Opin. in Genet. and Dev.* **5**, 507-515.
- Chalepakis, G. and Gruss, P. (1995). Identification of DNA recognition sequences for the Pax3 paired domain. *Gene* **162**, 267-270.
- Cheyette, B. N., Green, P. J., Martin, K., Garren, H., Hartenstein, V. and Zipersky, S. L. (1994). The *Drosophila sine oculus* encodes a homeodomain-containing protein required for the development of the entire visual system. *Neuron* **12**, 977-996.
- Cvekl, A. and Piatigorsky, J. (1996). Lens development and crystallin gene expression: many roles for Pax-6. *BioEssays* **18**, 621-630.
- Czerny, T. and Busslinger, M. (1995). DNA-binding and transactivation properties of Pax6: three amino acids in the paired domain are responsible for the different sequence recognition of Pax6 and BSAP (Pax5). *Mol. Cell. Biol.* **15**, 2858-2871.
- D'Amico-Martel, A. and Noden, D. M. (1983). Contributions of placodal and neural crest cells to avian peripheral ganglia. *Am. J. Anat.* **166**, 445-468.
- Dressler, G. R., Deutsch, U., Chowdhury, Nornes, H. O. and Gruss, P. (1990). Pax2, a new murine paired-box-containing gene and its expression in the developing excretory system. *Development* **109**, 787-95.
- Epstein, J. A., Cai, J., Glaser, T., Jepeal, L. and Maas, R. L. (1994). Identification of a Pax paired domain recognition sequence and evidence for DNA-dependent conformational changes. *J. Biol. Chem.* **269**, 8355-8361.
- Epstein, J. A., Shapiro, D. N., Cheng, J., Lam, P. Y. P. and Maas, R. L. (1996). Pax3 modulates expression of the c-Met receptor during limb muscle development. *Dev. Biol.* **93**, 4213-4218.
- Fujiwara, M., Uchida, T., Osumi-Yamashita, N. and Eto, K. (1994). Uchida rat (*rSey*): a new mutant rat with craniofacial abnormalities resembling those of the mouse Sey mutant. *Differentiation* **57**, 31-38.
- Gallagher, B. C., Henry, J. J. and Grainger, R. M. (1996). Inductive processes leading to inner ear formation during *Xenopus* development. *Dev. Biol.* **175**, 95-107.
- Glaser, T., Jepeal, L., Edwards, J. G., Young, S. R., Favor, J. and Maas, R. L. (1994). PAX6 gene dosage effect in a family with congenital cataracts, aniridia, anophthalmia and central nervous system defects. *Nature Genetics* **7**, 463-471. [erratum: *Nature Genetics* **8**, 203, 1994].
- Glaser, T., Walton, D. S., Cai, J., Epstein, J. A., Jepeal, L. and Maas, R. L. (1995). PAX6 Gene Mutations in Aniridia. In *Molecular Genetics of Ocular Disease*. (ed. J. Wiggs). pp. 51-82. New York: Wiley Liss, Inc.,
- Goulding, M. D., Lumsden, A. and Paquette, A. J. (1994). Regulation of Pax-3 expression in the dermamyotome and its role in muscle development. *Development* **120**, 957-971.
- Grainger, R. M. (1996). New perspectives on embryonic lens induction. *Seminars in Cell Dev. Biol.* **7**, 149-155.
- Grindley, J. C., Davidson, D. R. and Hill, R. E. (1995). The role of Pax6 in eye and nasal development. *Development* **121**, 1433-1442.
- Hanson, I., Brown, A. and van Heyningen, V. (1995). Pax6: more than meets the eye. *Trends Genet.* **11**, 268-272.
- Halder, G., Callaerts, P. and Gehring, W. J. (1995a). Induction of ectopic

- eyes by targeted expression of the *eyeless* gene in *Drosophila*. *Science* **267**, 1788-1792.
- Halder, G., Callaerts, P. and Gehring W. J.** (1995b). New perspectives on eye evolution. *Curr. Opin. Genet. Dev.* **5**, 602-609.
- Hill, R. E., Favor, J., Hogan, B. L. M., Ton, C. C. T., Sauders, G. F., Hanson, I. M., Prosser, J., Jordan, T., Hastie, N. D. and van Heyningen, V.** (1991). Mouse *Small eye* results from mutations in a *paired*-like homeobox-containing gene. *Nature* **354**, 522-525. [erratum: *Nature* **355**, 750, 1992].
- Hogan, B. L. M., Horsburgh, G., Cohen, J., Hetherington, C. M., Fisher, G. and Lyon, M. F.** (1986). *Small eyes (Sey)*: a homozygous lethal mutation on chromosome 2 which affects the differentiation of both lens and nasal placodes in the mouse. *J. Embryol. Exp. Morph.* **97**, 95-110.
- Jacobson, A. G.** (1966). Inductive processes in embryonic development. *Science* **152**, 25-34.
- Li, H. S., Yang, J. M., Jacobson, R. D., Pasko, D. and Sundin, O.** (1994). *Pax6* is first expressed in a region of ectoderm anterior to the early neural plate: implications for stepwise determination of the lens. *Dev. Biol.* **162**, 181-194.
- Manley, K. F. and Elliott, R. W.** (1991). RI Manager, a microcomputer program for the analysis of data from recombinant inbred strains. *Mamm. Genome* **1**, 123-126.
- Mansour, S. L., Goddard, J. M. and Capecchi, M. R.** (1993). Mice homozygous for a targeted disruption of the proto-oncogene *int-2* have developmental defects in the tail and inner ear. *Development* **117**, 13-28.
- Mardon, G., Solomon, N. M. and Rubin, G. M.** (1994). *dachshund* encodes a nuclear protein required for normal eye and leg development in *Drosophila*. *Development* **120**, 3473-3486.
- Nieuwkoop, P. D., Johnen, A. G. and Albers, B.** (1985). The epigenetic nature of chordate development. *Development of the cephalic placodes*, Ch. 15, pp. 203-214. Cambridge, UK: Cambridge University Press.
- Nornes, H. O., Dressler, G. R., Knapik, E. W., Deutsch U. and P. Gruss.** (1990). Spatially and temporally restricted expression of *Pax2* during murine neurogenesis. *Development* **109**, 797-809.
- Oliver, G., Wehr, R., Jenkins, N. A., Copeland, N. G., Cheyette, B. N. R., Hartenstein, V., Zipursky, S. L. and Gruss, P.** (1995a). Homeobox genes and connective tissue patterning. *Development* **121**, 693-705.
- Oliver, G., Mailhos, A., Wehr, R., Copeland, N. G., Jenkins, N. A. and Gruss, P.** (1995b). *Six3*, a murine homologue of the *sine oculis* gene, demarcates the most anterior border of the developing neural plate and is expressed during eye development. *Development* **121**, 4045-4055.
- Qin, F. and Kirby, M. L.** (1995). *Int-2* influences the development of the nodose ganglion. *Pediatr. Res.* **38**, 485-492.
- Quinn J. C., West, J. D. and Hill, R. E.** (1996). Multiple functions for *Pax6* in mouse eye and nasal development. *Genes Dev.* **10**, 435-446.
- Quiring, R., Walldorf, U., Kloter, U. and Gehring, W. J.** (1994). Homology of the *eyeless* gene of *Drosophila* to *Small eye* gene in mice and Aniridia in humans. *Science* **265**, 785-789.
- Ransom, R.** (1979). The time of action of three mutations affecting *Drosophila* eye morphogenesis. *J. Embryol. Exp. Morphol.* **53**, 25-235.
- Rosen, B. and Beddington, R. S. P.** (1993). Whole-mount in situ hybridization in the mouse embryo: gene expression in three dimensions. *Trends Genet.* **9**, 162-167.
- Rowe, L. B., Nadeau, J. H., Turner, R., Frankel, W. N., Letts, V. A., Eppig, J. T., Ko, M. S. H. Ko, Thurston, S. J. and Birkenmeier, E. H.** (1994). Maps from two interspecific backcross DNA panels available as a community genetic mapping resource. *Mamm. Genome* **5**, 253-274.
- Schedl, A., Ross, A., Lee, M., Engelkamp, D., Rashbass, P., van Heyningen, V. and Hastie, N. D.** (1996). Influence of *PAX6* gene dosage on development: overexpression causes severe eye abnormalities. *Cell* **86**, 71-82.
- Shen, W. and Mardon, G.** (1997). Ectopic eye development in *Drosophila* induced by directed *dachshund* expression. *Development* **124**, 45-52.
- Serikaku, M. A. and O'Tousa J. E.** (1994). *sine oculis* is a homeobox gene required for *Drosophila* visual system development. *Genetics* **138**, 137-1150.
- Ton, C. C., Hirvonen, H., Miwa, H., Wei, M. M., Monaghan, P., Jordan T., van Heyningen, V., Hastie, N. D., Meijers-Heijboer, H., Drechsler, M., Royer-Pokora, B., Collins, F., Swaroop, A., Strong, L. C. and Saunders, G. F.** (1991). Positional cloning and characterization of a paired box- and homeobox-containing gene from the aniridia region. *Cell* **67**, 1059-1074.
- Verwoerd, C. D. A. and van Oostrom, C. G.** (1979). Cephalic neural crest and placodes. *Adv. Anat. Embryol. Cell Biol.* **58**, 1-75, Springer-Verlag, Heidelberg, Germany.
- Wallin, J., Eibel, H., Neubuser, A., Wilting, J., Koseki, H. and Balling, R.** (1996). *Pax1* is expressed during development of the thymus epithelium and is required for normal T-cell maturation. *Development* **122**, 23-30.
- Walther, C. and Gruss, P.** (1991). *Pax6*, a murine paired box gene, is expressed in the developing CNS. *Development* **113**, 1435-1449.
- Webb, J. F. and Noden, D. M.** (1993). Ectodermal placodes: contributions to the development of the vertebrate head. *Am. Zool.* **33**, 434-447.
- Wilkinson, D. G. and Green, J.** (1990). In situ hybridization and the three-dimensional reconstruction of serial sections. In *Postimplantation Mammalian Embryos: A Practical Approach*. (ed. Copp, A. J. and Cockroft, D. L.). pp. 155-171. Oxford: IRL Press.
- Xu, W., Rould, M. A., Jun, S., Desplan, C. and Pabo, C. O.** (1995). Crystal structure of a paired domain-DNA complex at 2.5 Å resolution reveals structural basis for Pax developmental mutations. *Cell* **80**, 639-650.
- Zuker, C. S.** (1995). On the evolution of eyes: would you like it simple or compound? *Science* **265**, 742-743. [comment].
